# Supplementary material
Source: Copernicus journal article supplement (doi:10.5194/acp-26-9037-2026)
Supplement: Supplementary file 1 [file acp-26-9037-2026-supplement.pdf]

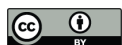

*Supplement of*

## **Residential burning is a potentially significant source of soluble iron to the ocean**

**Rui Li et al.**

*Correspondence to:* Douglas S. Hamilton (dshamil3@ncsu.edu) and Mingjin Tang (mingjintang@126.com)

The copyright of individual parts of the supplement might differ from the article licence.

# 1 S1 Experimental methods and results

## 2 S1.1 Experimental methods

3 Figure S1 show the schematic diagram of the apparatus used to generate and collect  
4 aerosol emitted by residential coal and biofuel combustion, and Figure S2 displays one of its  
5 photos taken during the sampling.

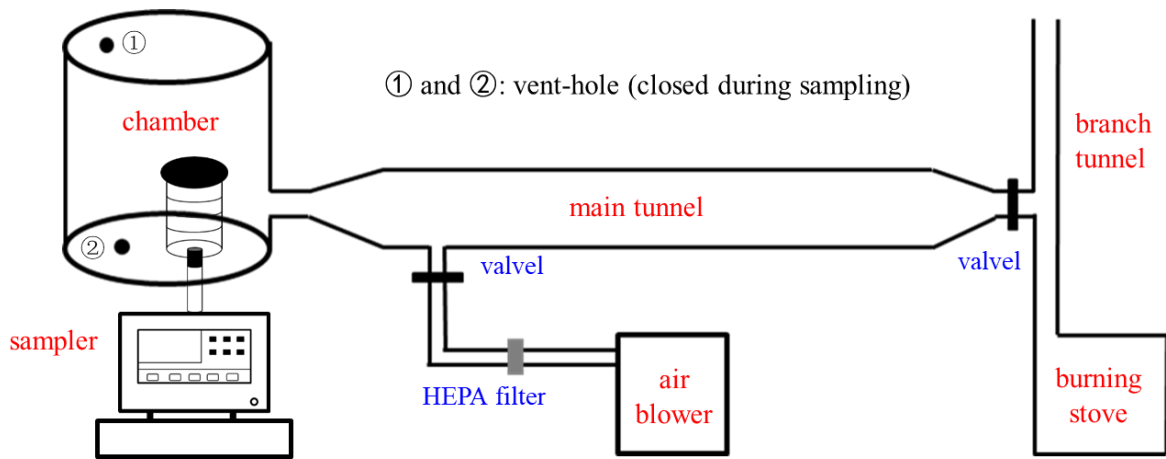

6  
7 **Figure S1.** Schematic diagram of the apparatus used in our work to collect aerosol particles  
8 emitted by domestic coal and biofuel burning.

9  
10 As shown in Figure 1, coal and biofuel were burned in a commercial cook stove, which is  
11 widely used in rural areas in China. Exhaust in the chimney, generated by coal and biofuel  
12 combustion, could go directly to the ambient air, or alternatively it could enter a horizontally-  
13 mounted long metal tube (inner diameter: 30 cm; length: 200 cm). After exiting the long metal  
14 tube, the exhaust entered a vertically-mounted chamber (inner diameter: 45 cm; height: 50 cm),  
15 and PM<sub>2.5</sub> was collected onto pre-cleaned Whatman 41 (W41) cellulose filters (diameter: 88  
16 mm) via a medium volume aerosol sampler (TH-150C, Tianhong Co.) operated at a flow rate  
17 of 100 L/min. Filters were cleaned to reduce background using the procedure detailed  
18 elsewhere (Zhang et al., 2022). Aerosol sampling was stopped automatically when the pressure

19 dropped to the threshold because of accumulation of aerosol on the filter, and sampling times  
20 ranged from a few to tens of minutes, varying for fuel types. Between combustion experiments,  
21 the tube was flushed to remove smoke generated from the previous combustion experiment.

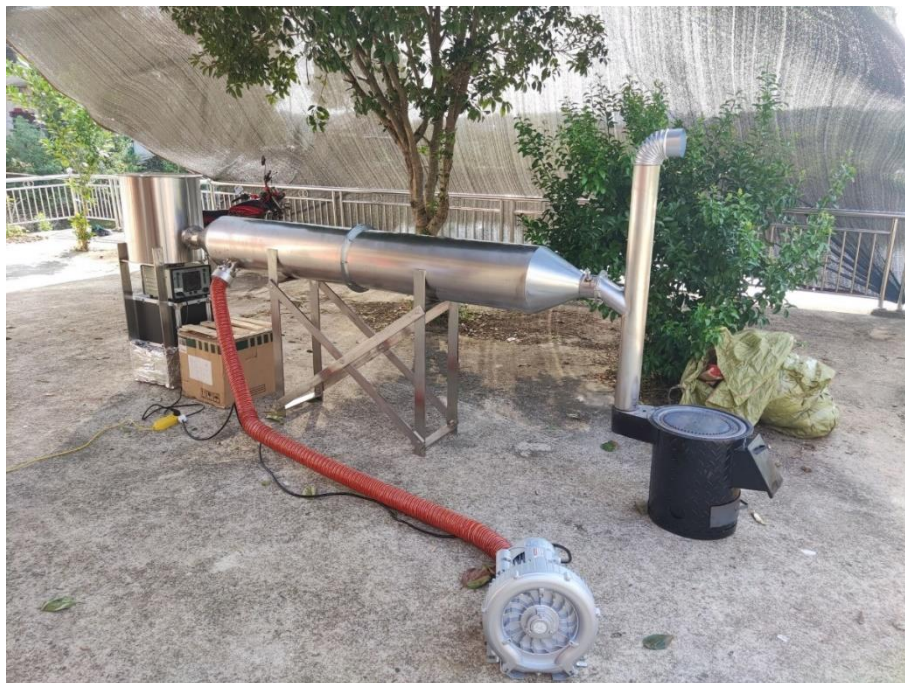

22  
23 **Figure S2.** A photo of the apparatus used in our work to collect aerosol particles emitted by  
24 domestic coal and biofuel burning.

25  
26

## 27 **S1.2 Experimental results**

### 28 **S1.2.1 Fe content of municipal waste fly ash, oil fly ash and oil bottom ash**

29 For the three municipal waste fly ash samples we investigated, Fe content ranged from  
30 3.9 to 29.7 mg/g, with average and median values being  $18.7 \pm 13.3$  and 22.6 mg/g (Table S5).  
31 Several previous studies measured Fe content in municipal waste fly ash (Table S6). For  
32 example, the average Fe content were measured to be  $18.0 \pm 13.3$  mg/g ( $n = 3$ ) and 23.1 mg/g  
33 ( $n = 1$ ) in two studies (Cobo et al., 2009; Raclavská et al., 2017), very similar to our results;  
34 another four studies (Funari et al., 2017; Liu et al., 2009; Wu and Ting, 2006; Wu et al., 2012)  
35 reported lower Fe content, ranging from 5.2 to 10.9 mg/g; some other studies (Bayuseno and  
36 Schmahl, 2011; Lin et al., 2003; Wan et al., 2006; Zhang et al., 2011) also reported slightly  
37 higher Fe content, ranging from 27.1 to 34.3 mg/g. In summary, most studies suggest that Fe  
38 content in municipal waste fly ash are around 20 mg/g, and it has been set to 18.8 mg/g in a  
39 modeling study (Rathod et al., 2020), being consistent with experimental results.

40 Fe content in the two oil fly ash samples we examined were measured to be 9.1 and 18.3  
41 mg/g (Table S5), and the average value was determined to be  $13.7 \pm 4.6$  mg/g. The Fe content  
42 was measured to be 15.0 mg/g for one oil fly ash sample (Celo et al., 2015), close to the value  
43 we reported. In another two studies (Agrawal et al., 2008; Sippula et al., 2014), the average Fe  
44 content was measured to be  $1.98 \pm 0.35$  ( $n = 4$ ) and  $1.60 \pm 1.21$  mg/g ( $n = 14$ ), lower than our  
45 result. In a modeling study (Rathod et al., 2020), the Fe content was set to 10 mg/g for oil fly  
46 ash, being consistent with the experimental results reported by our work and Celo et al. In  
47 addition, in our work the Fe content was measured to be 191 mg/g for one heavy oil bottom  
48 ash sample, much higher than that for oil fly ash.

49 **S1.2.2 Fe solubility of municipal waste fly ash, oil fly ash and oil bottom ash**

50 Fe solubility in acetate buffer (pH: 4.3) was determined to range from 0.58% to 2.41% for  
51 municipal waste fly ash (Table S5), with average and median values being  $1.51 \pm 0.92\%$  and  
52 1.54%, respectively. Few previous studies measured Fe solubility for municipal waste fly ash.  
53 Fe solubility was estimated to be  $<2\%$  for municipal waste fly ash when combustion  
54 temperature exceeded 1100 K (Rathod et al., 2020), agreeing with our experimental results.

55 Fe solubility in acetate buffer (pH: 4.3) was determined to be 11.70% and 13.43% for the  
56 two oil fly ash samples we examined (Table S5), with an average value of  $12.56 \pm 0.87\%$ . In  
57 previous work, Fe solubility was measured to be 35.7% at pH of 4.7 (Desboeufs et al., 2005)  
58 and 70% in deionized water (Schroth et al., 2009), both higher than our results. Although Fe  
59 solubility measured in different studies showed some variations, all the studies suggested that  
60 oil fly ash exhibited very high Fe solubility. Moreover, Fe solubility in acetate buffer (pH: 4.3)  
61 was measured in our work to be 25.47% for one heavy oil bottom ash. Oil fly ash was emitted  
62 by high temperature combustion but showed high Fe solubility. This is probably because heavy  
63 oil has high sulfur content, leading to the formation of sulfuric acid in combustion that can  
64 condense onto co-emitted Fe oxide particles and form highly soluble Fe sulfate (Rathod et al.,  
65 2020; Sippula et al., 2009).

66

67

68 **Table S1.** Fe content and solubility for power plant coal fly ash samples (each from a coal  
 69 power plant located in a different province in China) examined in this work.

| sample | Fe content ( $\mu\text{g/g}$ ) | Fe content ( $\text{mg/g}$ ) | Fe solubility (%) |
|--------|--------------------------------|------------------------------|-------------------|
| 1      | $3.65 \times 10^4$             | 36.5                         | 0.013             |
| 2      | $2.07 \times 10^4$             | 20.7                         | 0.038             |
| 3      | $4.41 \times 10^4$             | 44.1                         | 0.028             |
| 4      | $2.65 \times 10^4$             | 26.5                         | 0.029             |
| 5      | $3.44 \times 10^4$             | 34.4                         | 0.008             |
| 6      | $2.50 \times 10^4$             | 25.0                         | 0.029             |
| 7      | $3.82 \times 10^4$             | 38.2                         | 0.128             |
| 8      | $10.4 \times 10^4$             | 103.8                        | 0.014             |
| 9      | $2.35 \times 10^4$             | 23.5                         | 0.028             |
| 10     | $3.86 \times 10^4$             | 38.6                         | 0.002             |
| 11     | $5.37 \times 10^4$             | 53.7                         | 0.134             |
| 12     | $3.77 \times 10^4$             | 37.7                         | 0.029             |
| 13     | $2.41 \times 10^4$             | 24.1                         | 0.018             |
| 14     | $3.19 \times 10^4$             | 31.9                         | 0.008             |
| 15     | $2.41 \times 10^4$             | 24.1                         | 0.057             |
| 16     | $2.58 \times 10^4$             | 25.8                         | 0.021             |
| 17     | $4.59 \times 10^4$             | 45.9                         | 0.073             |
| 18     | $2.69 \times 10^4$             | 26.9                         | 0.044             |
| 19     | $5.57 \times 10^4$             | 55.7                         | 0.036             |
| 20     | $3.95 \times 10^4$             | 39.5                         | 0.132             |
| 21     | $3.50 \times 10^4$             | 35.0                         | 0.021             |
| 22     | $6.35 \times 10^4$             | 63.5                         | 0.041             |
| 23     | $3.97 \times 10^4$             | 39.7                         | 0.146             |
| 24     | $4.42 \times 10^4$             | 44.2                         | 0.091             |
| 25     | $2.41 \times 10^4$             | 24.1                         | 0.013             |
| 26     | $4.17 \times 10^4$             | 41.7                         | 0.032             |
| 27     | $2.31 \times 10^4$             | 23.1                         | 0.020             |
| 28     | $5.33 \times 10^4$             | 53.3                         | 0.172             |
| 29     | $2.23 \times 10^4$             | 22.3                         | 0.070             |
| 30     | $2.76 \times 10^4$             | 27.6                         | 0.024             |
| 31     | $2.17 \times 10^4$             | 21.7                         | 0.024             |

70

71

72 **Table S2.** Fe content and solubility for domestic coal combustion aerosols examined in this  
73 work.

| sample              | Fe content ( $\mu\text{g/g}$ ) | Fe solubility (%) |
|---------------------|--------------------------------|-------------------|
| anthracite          | 32                             | 52.04             |
|                     | 26                             | 27.05             |
| semibituminous coal | 35                             | 11.71             |
|                     | 45                             | 12.66             |
|                     | 62                             | 34.52             |
|                     | 26                             | 100.00            |
| bituminous coal     | 101                            | 7.03              |
|                     | 43                             | 43.84             |
|                     | 25                             | 29.86             |
|                     | 42                             | 14.26             |

74

75

76

77

78 **Table S3.** Fe content and solubility for steelwork fly ash samples examined in this work.

| sample | Fe content ( $\mu\text{g/g}$ ) | Fe content ( $\text{mg/g}$ ) | Fe solubility (%) |
|--------|--------------------------------|------------------------------|-------------------|
| 1      | $3.47 \times 10^5$             | 346.5                        | 0.022             |
| 2      | $5.47 \times 10^5$             | 546.8                        | 0.007             |
| 3      | $4.46 \times 10^5$             | 446.2                        | 0.022             |
| 4      | $4.34 \times 10^5$             | 434.0                        | 0.012             |
| 5      | $9.79 \times 10^4$             | 97.9                         | 0.069             |
| 6      | $1.34 \times 10^4$             | 13.4                         | 6.928             |
| 7      | $1.28 \times 10^4$             | 12.8                         | 0.191             |
| 8      | $2.09 \times 10^4$             | 20.9                         | 0.395             |
| 9      | $6.45 \times 10^5$             | 644.9                        | 0.011             |
| 10     | $2.13 \times 10^5$             | 213.1                        | 4.024             |
| 11     | $5.66 \times 10^5$             | 565.6                        | 3.126             |
| 12     | $3.94 \times 10^5$             | 393.8                        | 1.980             |
| 13     | $4.48 \times 10^5$             | 448.3                        | 0.042             |
| 14     | $2.59 \times 10^4$             | 25.9                         | 0.923             |
| 15     | $9.74 \times 10^4$             | 97.4                         | 10.640            |
| 16     | $1.97 \times 10^5$             | 197.1                        | 0.055             |
| 17     | $3.03 \times 10^5$             | 302.8                        | 0.035             |
| 18     | $5.97 \times 10^5$             | 596.8                        | 0.010             |
| 19     | $4.73 \times 10^5$             | 472.7                        | 0.022             |
| 20     | $4.04 \times 10^5$             | 404.3                        | 0.014             |
| 21     | $7.32 \times 10^5$             | 732.2                        | 0.013             |
| 22     | $3.58 \times 10^4$             | 35.8                         | 0.158             |
| 23     | $9.19 \times 10^5$             | 918.9                        | 8.589             |
| 24     | $4.46 \times 10^5$             | 446.2                        | 0.050             |
| 25     | $5.81 \times 10^3$             | 5.8                          | 1.983             |
| 26     | $6.07 \times 10^5$             | 607.4                        | 0.180             |
| 27     | $2.60 \times 10^4$             | 26.0                         | 0.068             |
| 28     | $5.80 \times 10^3$             | 5.8                          | 0.158             |
| 29     | $7.38 \times 10^3$             | 7.4                          | 0.064             |

79

80

81

82 **Table S4.** Fe content and solubility for biofuel burning aerosols examined in this work.

| sample      | Fe content ( $\mu\text{g/g}$ ) | Fe solubility (%) |
|-------------|--------------------------------|-------------------|
| wheat       | 21                             | 60.14             |
|             | 8                              | 100.00            |
|             | 6                              | 26.09             |
|             | 12                             | 71.87             |
| rice        | n. a.                          | 40.52             |
|             | 28                             | 47.06             |
|             | 20                             | 4.34              |
| corn        | 3                              | 44.83             |
|             | 2                              | 100.00            |
|             | 3                              | 100.00            |
|             | 15                             | 77.52             |
|             | 7                              | 88.36             |
| rape        | 70                             | 54.34             |
|             | 6                              | 57.39             |
| cogongrass  | 11                             | 89.41             |
|             | 10                             | 85.33             |
|             | 19                             | 86.46             |
|             | 71                             | 37.56             |
| China fir   | 3                              | 5.75              |
|             | 3                              | 43.64             |
|             | 12                             | 20.01             |
| pine        | 72                             | 67.55             |
|             | 101                            | 100.00            |
|             | 40                             | 65.91             |
| poplar      | 18                             | 2.86              |
| pine needle | 13                             | 24.01             |
|             | 21                             | 27.06             |
|             | 15                             | 41.86             |

83

84

85 **Table S5.** Fe content and solubility for municipal waste fly ash, oil fly ash and oil bottom ash  
 86 samples examined in this work. WP-2 is a fly ash sample obtained from an electrostatic  
 87 precipitator in a waste incineration plant in Shanghai, China (Li et al., 2021), and BCR-176R  
 88 and BCR-615 are certified reference materials provided by the Institute for Reference Materials  
 89 and Measurements.

| sample                  | Fe content ( $\mu\text{g/g}$ ) | Fe content (mg/g) | Fe solubility (%) |
|-------------------------|--------------------------------|-------------------|-------------------|
| municipal waste fly ash |                                |                   |                   |
| WP-2                    | $3.87 \times 10^3$             | 3.9               | 0.58              |
| BCR-176R                | $2.26 \times 10^4$             | 22.6              | 2.41              |
| BCR-615                 | $2.97 \times 10^4$             | 29.7              | 1.54              |
| oil bottom ash          | $1.91 \times 10^5$             | 191.5             | 25.47             |
| oil fly ash             |                                |                   |                   |
| diesel oil              | $1.83 \times 10^4$             | 18.3              | 11.70             |
| heavy fuel oil          | $9.06 \times 10^3$             | 9.1               | 13.43             |

90

91

92 **Table S6.** Summary of Fe content (mg/g) for anthropogenic and combustion aerosol Fe determined in our present study and previous work (*n*:  
 93 number of samples examined).

| sample type        | size range        | <i>n</i>  | range       | average     | median                  | Reference                  |
|--------------------|-------------------|-----------|-------------|-------------|-------------------------|----------------------------|
| power plant        |                   | 31        | 20.7-103.8  | 37.2±16.8   | 35.0                    | This work                  |
| coal fly ash       |                   | 3         | 16.0-52.0   | 33.0±18.0   | 31.0                    | Baldo et al. (2021)        |
|                    |                   | 7         | 21.8-205.1  | 65.9±67.4   | 34.4                    | Goodarzi (2006)            |
|                    |                   | 1         |             | 46.7        |                         | Meij (1994)                |
|                    |                   | 23        | 18.2-112.0  | 57.8±22.7   | 52.5                    | Moreno et al. (2005)       |
|                    |                   | 4         | 7.7-97.3    | 54.3±39.5   | 56.0                    | Jankowski et al. (2006)    |
|                    |                   | 4         | 58.9-101.0  | 81.1±19.4   | 82.3                    | Dutta et al. (2009)        |
|                    |                   | 4         | 27.0-119.0  | 86.0±43.0   | 97.5                    | Fu et al. (2012)           |
|                    | 7                 | 38.3-98.6 | 62.1±26.7   | 43.2        | Li et al. (2022)        |                            |
| domestic coal      | PM <sub>2.5</sub> | 10        | 0.025-0.101 | 0.044±0.023 | 0.038                   | This work                  |
| combustion aerosol | PM <sub>2.5</sub> | 3         |             | 0.048±0.035 |                         | Patil et al. (2013)        |
|                    | PM <sub>2.5</sub> | 4         |             | 0.671±0.023 |                         | Watson et al. (2001)       |
|                    | PM <sub>2.5</sub> | 5         |             | 0.7±0.1     |                         | Zhang et al. (2012)        |
|                    | PM <sub>10</sub>  | 3         |             | 0.061±0.044 |                         | Patil et al. (2013)        |
| steelwork fly ash  |                   | 29        | 5.8-918.9   | 312.6±246.1 | 346.5                   | This work                  |
|                    |                   | 1         |             | 358.9       |                         | Souza et al. (2010)        |
|                    |                   | 1         |             | 369.3       |                         | Vieira et al. (2013)       |
|                    |                   | 1         |             | 312.2       |                         | Silva et al. (2019)        |
|                    |                   | 4         | 288.2-340.3 | 329.1±22.6  | 324.4                   | Alizadeh and Momeni (2016) |
|                    |                   |           |             | 280-380     |                         | Hagni et al. (1991)        |
|                    |                   | 1         |             |             | 86.0                    | Stathopoulos et al. (2013) |
|                    | 1                 |           |             | 128.1       | Xia and Picklesi (2000) |                            |

|                         |                   |    |             |             |       |                              |
|-------------------------|-------------------|----|-------------|-------------|-------|------------------------------|
|                         |                   | 1  |             | 150.8       |       | Loaiza et al. (2017)         |
|                         |                   | 1  |             | 286.5       |       | Laforest and Duchesne (2006) |
|                         |                   | 1  |             | 284.6       |       | Alsheyab and Khedaywi (2016) |
|                         |                   | 1  |             | 238.7       |       | Li et al. (2023)             |
|                         |                   | 4  | 234.1-361.1 | 267.3±4.8   | 283.6 | Al-Negheimish et al. (2021)  |
|                         |                   | 1  |             | 489.6       |       | Machado et al. (2006)        |
|                         |                   | 2  | 430-470     | 450±20      | 450   | Patil et al. (2013)          |
|                         |                   | 10 | 8.2-720     |             |       | Hleis et al. (2013)          |
|                         |                   | 1  |             | 515.0       |       | Ye et al. (2021)             |
| Biofuel burning aerosol | PM <sub>2.5</sub> | 27 | 0.002-0.101 | 0.023±0.026 | 0.013 | This work                    |
|                         | PM <sub>2.5</sub> | 3  |             | 0.024±0.017 |       | Patil et al. (2013)          |
|                         | PM <sub>2</sub>   | 2  |             | 0.090       | 0.090 | Hildemann et al. (1991)      |
|                         | PM <sub>2.5</sub> | 3  |             | 0.167±0.259 |       | Watson et al. (2001)         |
|                         | PM <sub>2.5</sub> | 4  |             | 0.180±0.196 |       | Watson et al. (2001)         |
|                         | PM <sub>2.5</sub> | 5  | 0.031-0.615 | 0.162       | 0.115 | Hedberg et al. (2002)        |
|                         | PM <sub>2.5</sub> | 1  |             | 0.440       |       | Alves et al. (2011)          |
|                         | PM <sub>2.5</sub> | 4  |             | 0.400±0.100 |       | Zhang et al. (2012)          |
|                         | PM <sub>10</sub>  | 4  | 0.250-1.70  | 0.723±0.661 | 0.470 | Schmidl et al. (2008)        |
| municipal waste fly ash |                   | 3  | 3.9-29.7    | 18.7±13.3   | 22.6  | This work                    |
|                         |                   | 3  | 7.8-33      | 18.0±13.3   | 13.2  | Raclavská et al. (2017)      |
|                         |                   | 1  |             | 23.1        |       | Cobo et al. (2009)           |
|                         |                   | 1  |             | 5.2         |       | Wu and Ting (2006)           |
|                         |                   | 1  |             | 5.5         |       | Funari et al. (2017)         |
|                         |                   | 1  |             | 10.5        |       | Wu et al. (2012)             |
|                         |                   | 1  |             | 10.9        |       | Liu et al. (2009)            |
|                         |                   | 1  |             | 29.4        |       | Zhang et al. (2011)          |
|                         |                   | 1  |             | 33.8        |       | Wan et al. (2006)            |

|                |    |            |           |      |                             |
|----------------|----|------------|-----------|------|-----------------------------|
|                | 1  |            | 34.3      |      | Lin et al. (2003)           |
|                | 1  |            | 37.1      |      | Bayuseno and Schmahl (2011) |
| oil fly ash    | 2  | 9.1-18.3   | 13.7±4.6  | 13.7 | This work                   |
|                | 7  |            | 15.0      |      | Celo et al. (2015)          |
|                | 4  | 1.55-2.36  | 1.98±0.35 | 2.10 | Agrawal et al. (2008)       |
|                | 14 | 0.331-4.46 | 1.60±1.21 | 1.16 | Sippula et al. (2014)       |
| oil bottom ash | 1  |            | 191       | 191  | This work                   |

95 **Table S7.** Summary of Fe solubility (%) for anthropogenic and combustion aerosol Fe determined in our present study and previous work (*n*:  
 96 number of samples examined; pH: acidity of the leaching solution).

| sample type                         | size range | <i>n</i> | pH   | range       | average     | median | Reference               |
|-------------------------------------|------------|----------|------|-------------|-------------|--------|-------------------------|
| power plant                         |            | 31       | 4.3  | 0.002-0.17  | 0.05±0.05   | 0.03   | This work               |
| coal fly ash                        |            | 1        | ~6   |             | 0.06        |        | Oakes et al. (2012)     |
|                                     |            | 1        | ~4.7 |             | 0.2         |        | Desboeufs et al. (2005) |
|                                     |            | 7        | 4.3  | 0.09-0.87   | 0.24±0.28   | 0.13   | Li et al. (2022)        |
|                                     |            | 7        | ~6   | 0.02-0.75   | 0.16±0.26   | 0.06   | Li et al. (2022)        |
| domestic coal<br>combustion aerosol |            | 10       | 4.3  | 7.03-100    | 33.30±27.71 | 28.45  | This work               |
| steelwork fly ash                   |            | 29       | 4.3  | 0.007-10.64 | 1.37±2.77   | 0.07   | This work               |
| biofuel burning<br>aerosol          |            | 28       | 4.3  | 2.86-100    | 56.07±30.95 | 55.87  | This work               |
| municipal waste fly<br>ash          |            | 3        | 4.3  | 0.58-2.41   | 1.51±0.92   | 1.54   | This work               |
| oil fly ash                         |            | 2        | 4.3  | 11.70-13.43 | 12.56±0.87  | 12.56  | This work               |
|                                     |            | 1        | 4.7  |             | 35.7        |        | Desboeufs et al. (2005) |
|                                     |            | 1        | ~6   |             | 70%         |        | Schroth et al. (2009)   |
| oil bottom ash                      |            | 1        | 4.3  |             | 25.47%      |        | This work               |

97

98

99

100 **S2 Modeling methods and results**

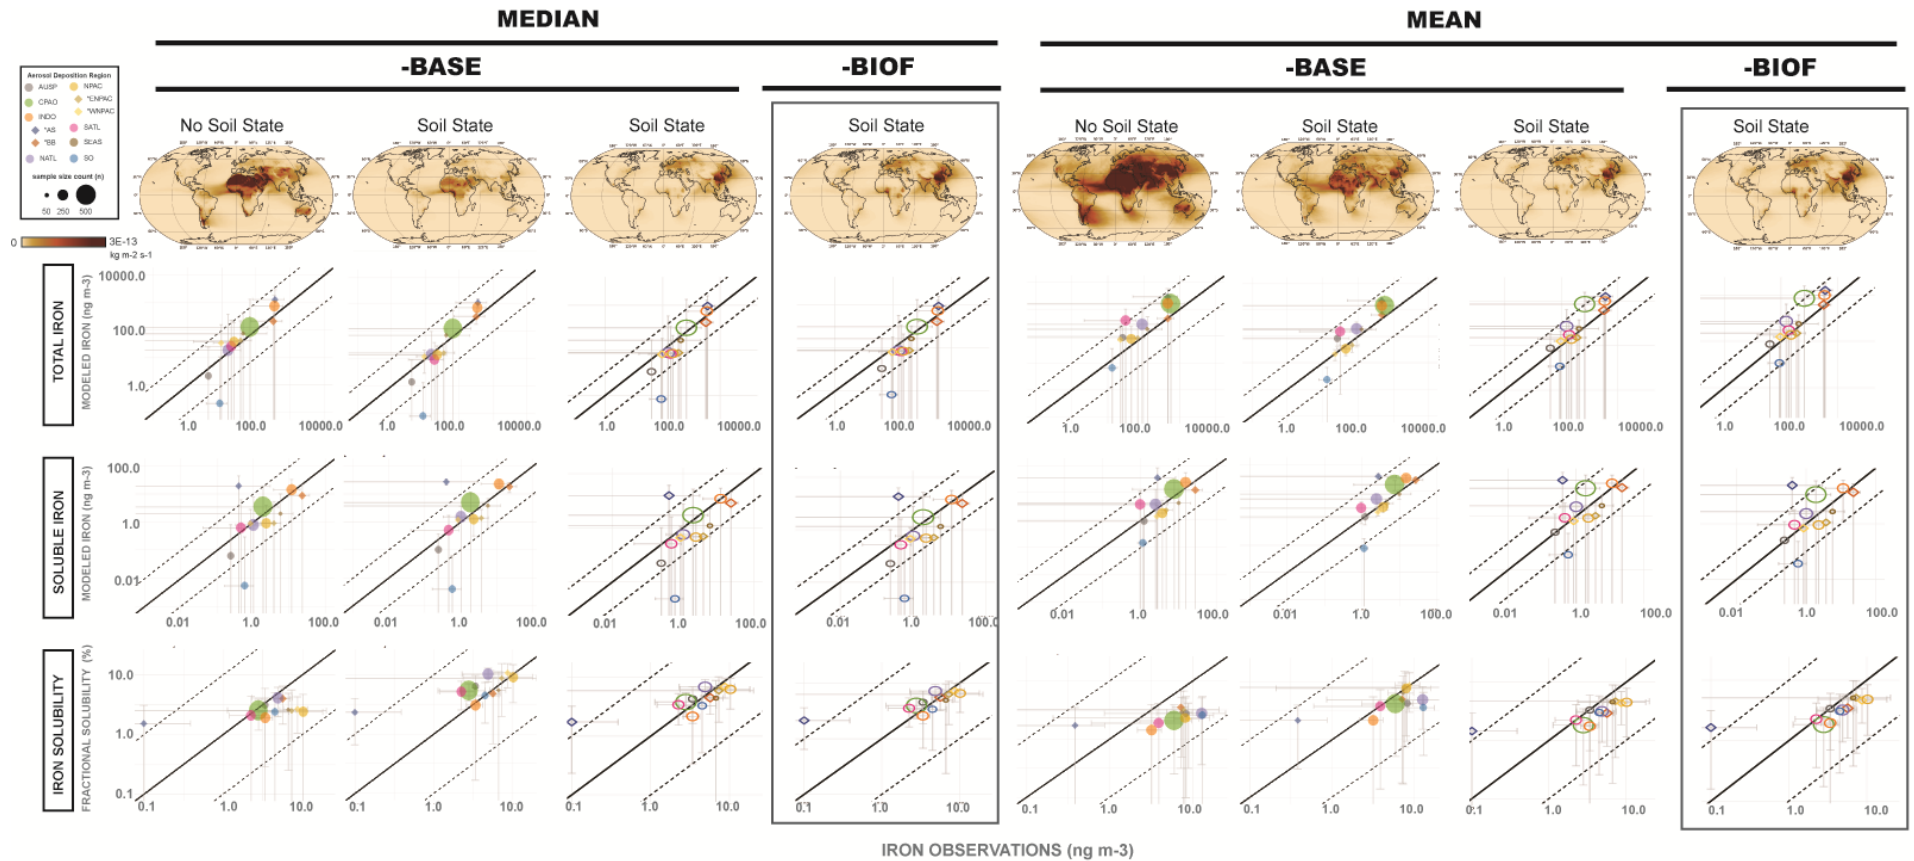

101

102 **Figure S3.** Model-observation comparisons ( $n = 1624$ ) of surface aerosol Fe concentrations using two different dust flux schemes (soil state

103 submodule included versus no soil state submodule). Open and solid circles indicate use of the central- and high-residential emission inventories,

104 respectively, and the box indicates MIMI v1.1. Model skill was best when the soil state scheme was used, -BIOF solubility parameters were applied,

105 the central-residential emissions inventory was used, and both modeled and observed aerosol Fe concentrations were aggregated over time and  
106 space by medians when compared to means.

107

108

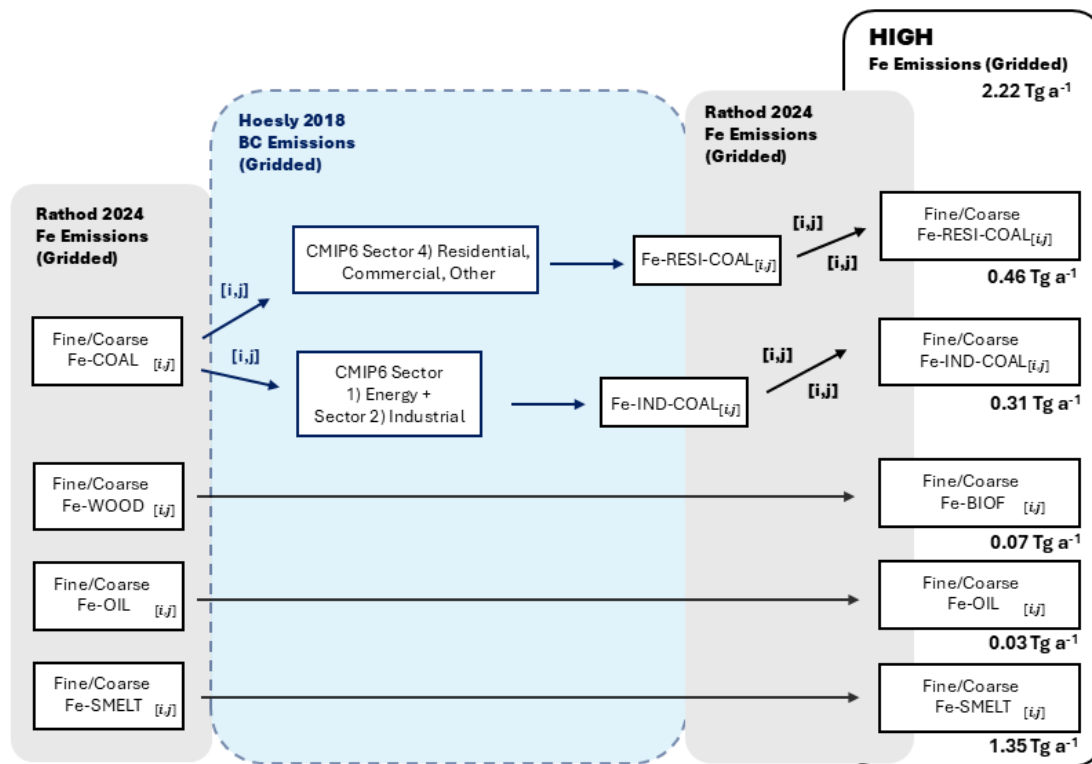

109

110 **Figure S4.** A flowchart representing the steps followed and datasets leveraged to create the

111 **high-combustion Fe emissions inventory.** Dashed outlines indicate a BC dataset; solid/no

112 outlines indicate an Fe dataset; [i,j] indicates that the fractional split was grid-cell dependent;

113 above/below the arrow indicates the fine/coarse fraction, respectively.

114

115

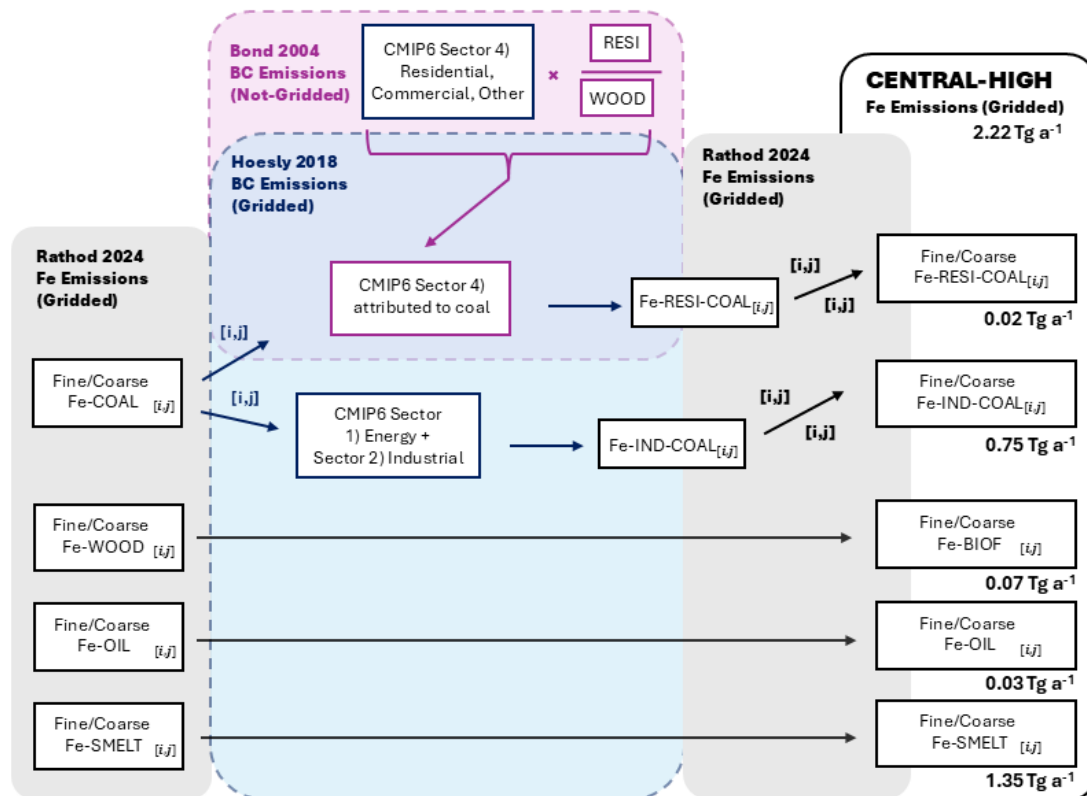

116

117 **Figure S5.** A flowchart representing the steps followed and datasets leveraged to create the

118 **central-high**-combustion Fe emissions inventory. Dashed outlines indicate a BC dataset;

119 solid/no outlines indicate an Fe dataset; [i,j] indicates that the fractional split was grid-cell

120 dependent; above/below the arrow indicates the fine/coarse fraction, respectively.

121

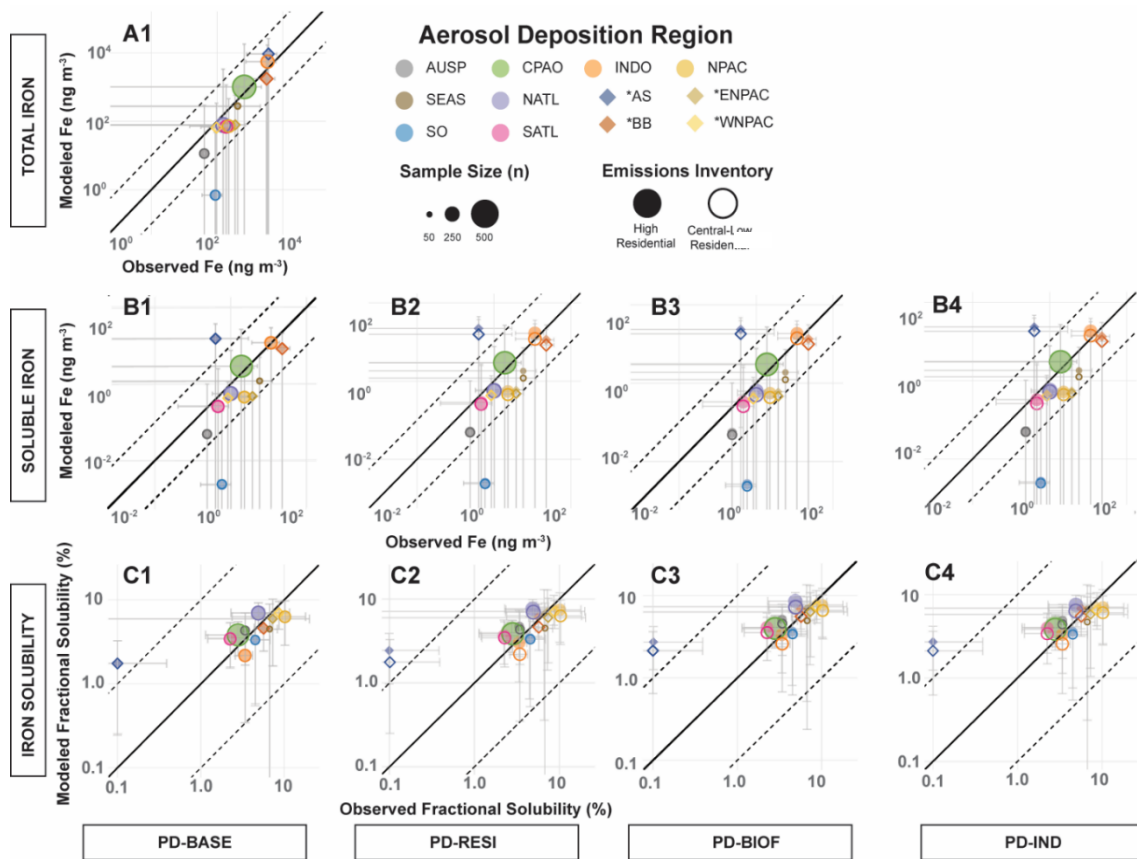

122

123 **Figure S6.** Comparison of modelling and observational data including results from the PD-

124 IND run, which altered oil and industrial coal solubility parameters (industrial coal Fe

125 solubility from 0.2 to 0.05% and oil from 38 to 25%). Error bars represent spatiotemporal

126 variance within each region. The solid black line indicates a 1-to-1 relationship and the dashed

127 lines represent deviation by  $\pm 1$  order of magnitude.

128

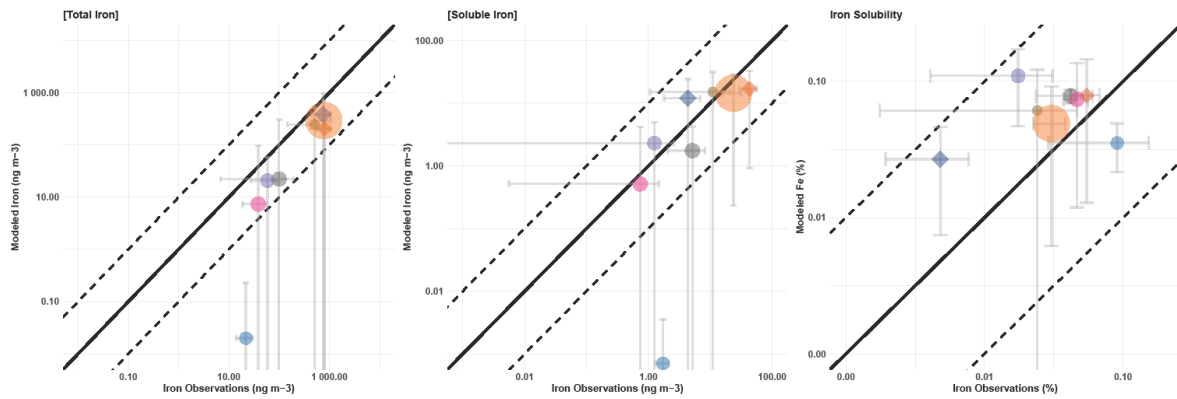

130 **Figure S7.** Model-observation comparisons ( $n = 25$ ) of surface aerosol Fe concentrations  
 131 using the high-residential emissions inventory for the model simulations and only using  
 132 observations co-located in regions where soluble Fe fluxes increased by a factor of 2 using  
 133 the PD-BIOF solubility parameters in attempt to isolate observations most representative of  
 134 residential coal and biofuel aerosol.

135

136

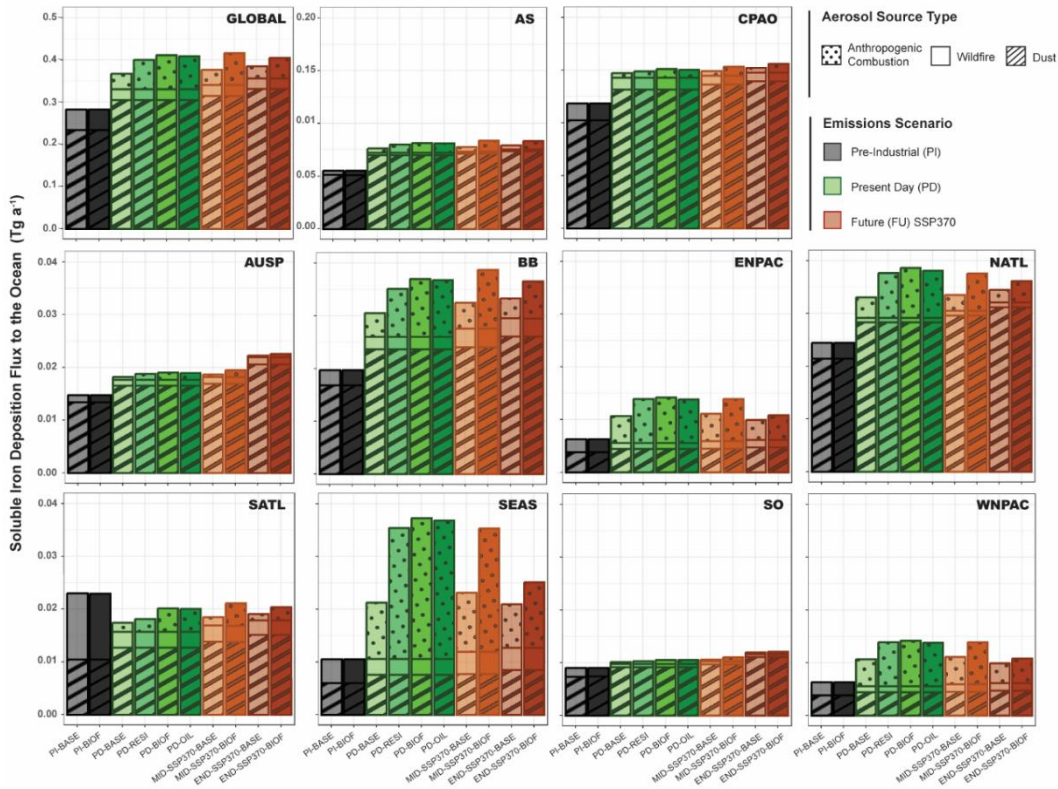

137

138 **Figure S8.** Deposition fluxes of soluble aerosol Fe to marine ecosystems globally and in  
 139 regional grouping with inclusion of the PD-IND (labeled PD-OIL in this figure) simulations.

140 Fluxes are source-apportioned (dust, biofuel burning, and anthropogenic combustion) and  
 141 provided for each model simulation.

142

143

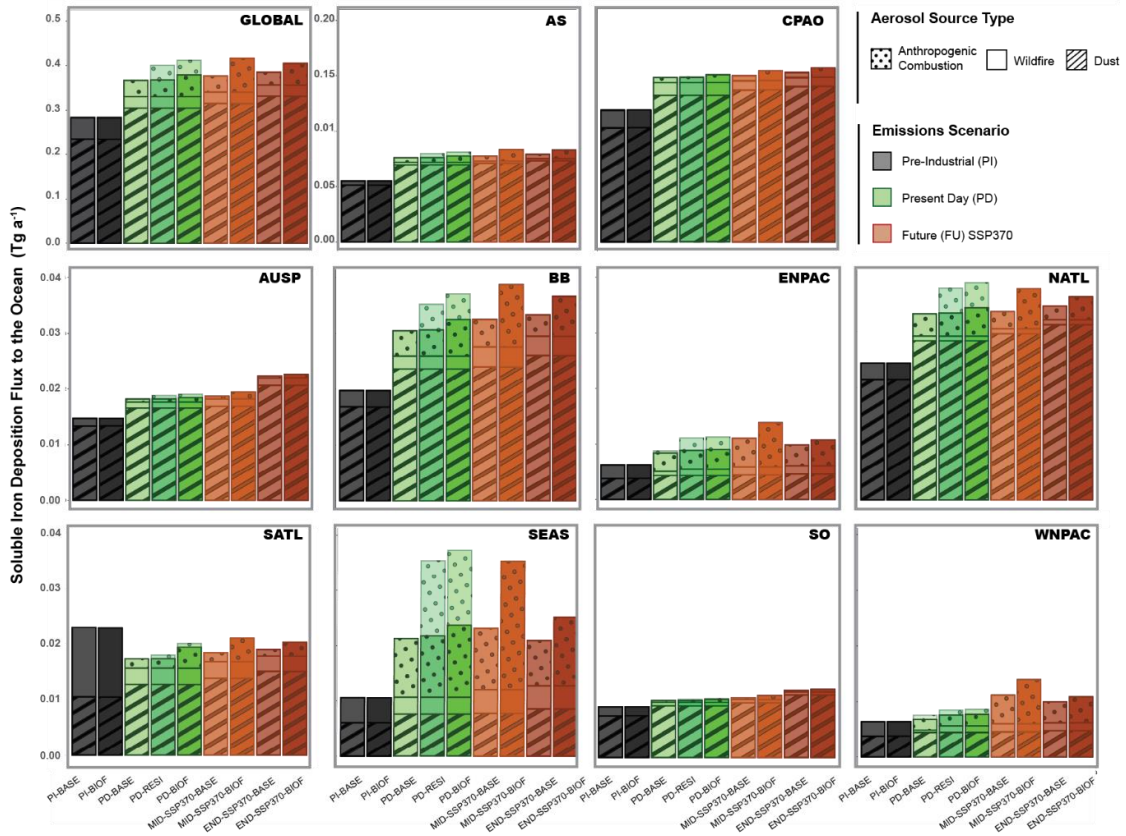

144

145 **Figure S9.** Deposition fluxes of soluble aerosol Fe to marine ecosystems globally and in  
 146 regional grouping with inclusion of the simulations that utilized the central-high residential  
 147 emissions inventory. Fluxes are source-apportioned (dust, biofuel burning, and anthropogenic  
 148 combustion) and provided for each model simulation. For the PD, transparent bars represent  
 149 the high-residential emissions inventory and opaque represent the central-high.

150

151

152

153 **Table S8.** Distinctions in fuel- and sector-type information pertaining to combustion emissions  
 154 in the literature applied in this work to estimate residential combustion emissions of iron. n.d.  
 155 = not determined.

|                  | Rathod et al.,<br>2020     | Hoesly et al.,<br>2018     | Bond et al.,<br>2004       | This work                   |
|------------------|----------------------------|----------------------------|----------------------------|-----------------------------|
| Chemical Species | Iron                       | Black Carbon               | Black Carbon               | Iron                        |
| Fuel-Type        | Coal, Biofuels             | n.d.                       | Coal, Biofuels             | Coal, Biofuels              |
| Sector           | Industrial,<br>Residential | Industrial,<br>Residential | Industrial,<br>Residential | Industrial,<br>Residential  |
| Gridding         | Only at fuel<br>level      | Only at sector<br>level    | n.d.                       | At fuel and<br>sector level |

156

157

158 **Table S9.** Final breakdown of Fe and Black Carbon (BC) emissions by sector (fuel-type) as  
 159 represented in the three Fe emissions inventories developed and tested in this work. Emission  
 160 fluxes are reported in Gg a<sup>-1</sup> with three significant figures.

| Fuel-Type                     | Central-Residential-Case |              | Central-High-Residential-Case |              | High Residential-Case |              |
|-------------------------------|--------------------------|--------------|-------------------------------|--------------|-----------------------|--------------|
|                               | Iron                     | Black Carbon | Iron                          | Black Carbon | Iron                  | Black Carbon |
| Residential Coal              | 4.88                     | 1060         | 16.3                          | 2160         | 464                   | 2160         |
| Industrial Coal               | 765                      | 1720         | 753                           | 1720         | 305                   | 1720         |
| Oil (shipping/transportation) | 34.5                     | 1250         | 34.5                          | 1250         | 34.5                  | 1250         |
| Residential Biofuel           | 70.6                     | 2400         | 71.5                          | 1330         | 71.5                  | 1330         |
| Waste                         | 0.92                     | 551          | n.d.                          | n.d.         | n.d.                  | n.d.         |
| Smelting                      | 1350                     | n.d.         | 1350                          | n.d.         | 1350                  | n.d.         |
| <b>TOTAL</b>                  | <b>2220</b>              | <b>6970</b>  | <b>2220</b>                   | <b>6460</b>  | <b>2220</b>           | <b>6460</b>  |

161

162

163

164 **Table S10.** Fe deposition flux budgets (Gg a<sup>-1</sup>; to two significant figures) for each key marine region utilizing the **high**-residential emissions  
 165 inventory. Values reported herein only include fluxes to marine systems (model grid cells where ocean fraction > 50%). AS: Arabian Sea, CPAO:  
 166 Central Pacific and Atlantic Ocean, AUSP: Australia and South Pacific, BB: Bay of Bengal, ENPAC: Eastern North Pacific, NATL: North Atlantic,  
 167 SATL: South Atlantic, SEAS: Southeastern Asia, SO: Southern Ocean, WNPAC: Western North Pacific.

| Simulation          |         | Region |      |      |      |      |      |      |       |       |      |      |     |      |
|---------------------|---------|--------|------|------|------|------|------|------|-------|-------|------|------|-----|------|
|                     |         | Global | SATL | NATL | AS   | BB   | INDO | SEAS | ENPAC | WNPAC | ARCT | AUSP | SO  | CPAO |
| Total Fe            | PD-BASE | 23000  | 1300 | 2200 | 6700 | 1500 | 8300 | 700  | 170   | 120   | 60   | 1200 | 600 | 8700 |
| Total<br>Anth. Fe   | PD-BASE | 590    | 24   | 72   | 57   | 65   | 120  | 240  | 43    | 19    | 9.3  | 11   | 5.3 | 39   |
| Soluble Fe          | PD-BASE | 370    | 17   | 33   | 76   | 31   | 110  | 21   | 6.6   | 4.2   | 2.0  | 18   | 10  | 150  |
|                     | PD-RESI | 400    | 18   | 38   | 80   | 35   | 120  | 35   | 9.0   | 5.1   | 2.4  | 19   | 10  | 150  |
|                     | PD-BIOF | 410    | 20   | 39   | 81   | 37   | 120  | 37   | 9.1   | 5.3   | 3.0  | 19   | 11  | 150  |
|                     | PD-IND  | 410    | 20   | 38   | 81   | 37   | 120  | 37   | 9.0   | 5.0   | 2.4  | 19   | 10  | 150  |
| Soluble<br>Anth. Fe | PD-BASE | 36     | 1.7  | 3.9  | 4.2  | 4.5  | 8.7  | 11   | 3.3   | 1.9   | 0.6  | 0.5  | 0.3 | 4.7  |
|                     | PD-RESI | 70     | 2.4  | 8.5  | 7.8  | 9.2  | 17   | 25   | 5.6   | 2.9   | 1.0  | 1.2  | 0.5 | 5.9  |
|                     | PD-BIOF | 81     | 4.4  | 9.4  | 9.3  | 11   | 20   | 27   | 5.8   | 3.0   | 1.1  | 1.4  | 0.7 | 8.1  |
|                     | PD-IND  | 78     | 4.4  | 8.9  | 9.1  | 11   | 20   | 26   | 5.6   | 2.8   | 1.0  | 1.3  | 0.7 | 7.6  |

168

169

170

171 **Table S11.** Fe deposition flux budgets (Gg a<sup>-1</sup>; to two significant figures) for each key marine region utilizing the **central-high**-residential  
 172 emissions inventory. Values reported herein only include fluxes to marine systems (model grid cells where ocean fraction > 50%).

| Simulation  |         | Region |      |      |      |      |      |      |       |       |      |      |     |      |
|-------------|---------|--------|------|------|------|------|------|------|-------|-------|------|------|-----|------|
|             |         | Global | SATL | NATL | AS   | BB   | INDO | SEAS | ENPAC | WNPAC | ARCT | AUSP | SO  | CPAO |
| Total Fe    | PD-BASE | 23000  | 1300 | 2200 | 6700 | 1500 | 8200 | 710  | 170   | 120   | 59   | 1200 | 600 | 8600 |
| Total Anth. | PD-BASE | 590    | 24   | 72   | 57   | 65   | 120  | 240  | 43    | 19    | 9.3  | 11   | 5.3 | 39   |
| Fe          |         |        |      |      |      |      |      |      |       |       |      |      |     |      |
| Soluble Fe  | PD-BASE | 370    | 17   | 33   | 76   | 30   | 110  | 21   | 6.6   | 4.2   | 2.0  | 18   | 10  | 150  |
|             | PD-RESI | 370    | 17   | 33   | 76   | 31   | 110  | 22   | 6.7   | 4.2   | 2.0  | 18   | 10  | 150  |
|             | PD-BIOF | 380    | 19   | 34   | 78   | 32   | 110  | 24   | 6.9   | 4.3   | 2.1  | 18   | 10  | 150  |
| Soluble     | PD-BASE | 36     | 1.7  | 3.9  | 4.2  | 4.5  | 8.7  | 11   | 3.3   | 1.9   | 0.6  | 0.5  | 0.3 | 4.7  |
| Anth. Fe    | PD-RESI | 37     | 1.7  | 4.1  | 4.3  | 4.7  | 9.0  | 11   | 3.3   | 1.9   | 0.6  | 0.6  | 0.3 | 4.7  |
|             | PD-BIOF | 49     | 3.8  | 5.0  | 5.7  | 6.5  | 12   | 13   | 3.5   | 2.1   | 0.7  | 0.8  | 0.5 | 6.9  |

173

174

175

176 **Table S12.** Fe deposition flux budgets ( $\text{Gg a}^{-1}$ ; to two significant figures) for each key marine region utilizing the **central**-residential emissions  
 177 inventory. Values reported herein only include fluxes to marine systems (model grid cells where ocean fraction > 50%).

| Simulation  |         | Region |      |      |      |      |      |      |       |       |      |      |      |      |
|-------------|---------|--------|------|------|------|------|------|------|-------|-------|------|------|------|------|
|             |         | Global | SATL | NATL | AS   | BB   | INDO | SEAS | ENPAC | WNPAC | ARCT | AUSP | SO   | CPAO |
| Total Fe    | PD-BASE | 23000  | 1300 | 2200 | 6700 | 1500 | 8200 | 710  | 170   | 120   | 59   | 1200 | 600  | 8600 |
| Total Anth. | PD-BASE | 610    | 25   | 68   | 61   | 70   | 130  | 250  | 41    | 20    | 9.3  | 10   | 5.4  | 54   |
| Fe          |         |        |      |      |      |      |      |      |       |       |      |      |      |      |
| Soluble Fe  | PD-BASE | 370    | 17   | 33   | 76   | 30   | 110  | 21   | 6.5   | 4.1   | 2.0  | 18   | 10   | 150  |
|             | PD-RESI | 370    | 17   | 33   | 76   | 30   | 110  | 21   | 6.5   | 4.2   | 2.0  | 18   | 10   | 150  |
|             | PD-BIOF | 380    | 17   | 33   | 78   | 32   | 110  | 23   | 7.0   | 4.4   | 2.0  | 18   | 10   | 150  |
| Soluble     | PD-BASE | 36     | 1.2  | 3.8  | 4.3  | 4.5  | 8.8  | 10   | 3.1   | 1.9   | 0.60 | 0.51 | 0.30 | 5.1  |
| Anth. Fe    | PD-RESI | 36     | 1.2  | 3.8  | 4.3  | 4.6  | 8.9  | 11   | 3.1   | 1.9   | 0.60 | 0.52 | 0.30 | 5.2  |
|             | PD-BIOF | 46     | 1.5  | 4.4  | 5.9  | 6.4  | 12   | 13   | 3.6   | 2.1   | 0.65 | 0.67 | 0.40 | 7.2  |

178

179 **Table S13.** Root Mean Square Error (RMSE) as a measure of difference between observed and  
180 modeled values for total and soluble Fe (ng m<sup>-3</sup>) and Fe solubility, grouped by marine region  
181 and aggregated by median. The case with the -BIOF solubility parameterization, with the soil  
182 state module, and the central-residential emissions inventory represent MIMI v1.1. Values  
183 reported reflect three significant figures.

|            |       | <b>-BIOF</b>                         | <b>-BASE</b>                         |                                               |                           |
|------------|-------|--------------------------------------|--------------------------------------|-----------------------------------------------|---------------------------|
|            |       | <b>With Soil State<br/>(Central)</b> | <b>With Soil State<br/>(Central)</b> | <b>With Soil State<br/>(High Residential)</b> | <b>Without Soil State</b> |
| Total Fe   |       | 1300                                 | 1300                                 | 1300                                          | 4050                      |
| Soluble Fe | AS    | 21.2                                 | 18.2                                 | 18.2                                          | 45.2                      |
| Solubility |       | 0.021                                | 0.016                                | 0.017                                         | 0.010                     |
| Total Fe   |       | 61.4                                 | 61.4                                 | 59.7                                          | 258                       |
| Soluble Fe | AUSP  | 2.12                                 | 2.128                                | 2.12                                          | 1.82                      |
| Solubility |       | 0.112                                | 0.113                                | 0.113                                         | 0.120                     |
| Total Fe   |       | 356                                  | 356                                  | 363                                           | 238                       |
| Soluble Fe | BB    | 22.6                                 | 25.6                                 | 25.5                                          | 22.4                      |
| Solubility |       | 0.064                                | 0.066                                | 0.066                                         | 0.070                     |
| Total Fe   |       | 1300                                 | 1300                                 | 1300                                          | 3320                      |
| Soluble Fe | CPAO  | 17.1                                 | 17.1                                 | 17.1                                          | 20.7                      |
| Solubility |       | 0.151                                | 0.151                                | 0.151                                         | 0.150                     |
| Total Fe   |       | 95.7                                 | 95.7                                 | 95.7                                          | 86.7                      |
| Soluble Fe | ENPAC | 5.81                                 | 5.83                                 | 5.83                                          | 4.86                      |
| Solubility |       | 0.080                                | 0.080                                | 0.080                                         | 0.080                     |
| Total Fe   |       | 203                                  | 203                                  | 202                                           | 582                       |
| Soluble Fe | NATL  | 3.84                                 | 3.85                                 | 3.85                                          | 3.68                      |
| Solubility |       | 0.249                                | 0.250                                | 0.250                                         | 0.260                     |
| Total Fe   |       | 122                                  | 122                                  | 122                                           | 1250                      |
| Soluble Fe | SATL  | 1.83                                 | 1.85                                 | 1.84                                          | 4.16                      |
| Solubility |       | 0.039                                | 0.040                                | 0.039                                         | 0.040                     |
| Total Fe   |       | 172                                  | 172                                  | 173                                           | 160                       |
| Soluble Fe | SEAS  | 13.6                                 | 13.8                                 | 13.8                                          | 12.1                      |
| Solubility |       | 0.064                                | 0.063                                | 0.064                                         | 0.065                     |
| Total Fe   |       | 19.7                                 | 19.7                                 | 19.7                                          | 21.2                      |
| Soluble Fe | SO    | 1.76                                 | 1.76                                 | 1.76                                          | 1.62                      |
| Solubility |       | 0.225                                | 0.226                                | 0.226                                         | 0.227                     |
| Total Fe   |       | 35.2                                 | 35.2                                 | 35.2                                          | 71.9                      |
| Soluble Fe | WNPAC | 4.60                                 | 4.61                                 | 4.61                                          | 4.34                      |
| Solubility |       | 0.051                                | 0.051                                | 0.051                                         | 0.080                     |

184

185 **Table S14.** Summary statistics for model (Mod)-observation (Obs) comparisons of soluble Fe.  
186 RMSE: root mean square error, SD: standard deviation.  $\Delta$ RMSE represents comparison  
187 between the base simulation (PD-BASE) and each sensitivity case using the high-residential  
188 emissions inventory as an upper constraint. Values are reported to two significant figures.

| Model Case | Region | Median Surface |      | Mean Surface           |                 | $\Delta$ Obs – Mod median | $\Delta$ RMSE   |
|------------|--------|----------------|------|------------------------|-----------------|---------------------------|-----------------|
|            |        | Concentration  |      | Concentration $\pm$ SD |                 |                           |                 |
|            |        | Obs            | Mod  | Obs                    | Mod             |                           |                 |
| PD-BASE    |        |                | 15   |                        | 16 $\pm$ 8.3    | -15                       | NA              |
| PD-RESI    | AS     | 0.40           | 22   | 2.7 $\pm$ 4.6          | 23 $\pm$ 14     | -22                       | 11              |
| PD-BIOF    |        |                | 23   |                        | 26 $\pm$ 17     | -23                       | 15              |
| PD-IND     |        |                | 23   |                        | 25 $\pm$ 17     | -23                       | 15              |
| PD-BASE    |        |                |      |                        | 0.05            |                           | 0.19 $\pm$ 0.4  |
| PD-RESI    | AUSP   | 0.24           | 0.05 | 1.1 $\pm$ 2.2          | 0.37 $\pm$ 0.92 | 0.19                      | -0.18           |
| PD-BIOF    |        |                | 0.05 |                        | 0.44 $\pm$ 1.15 | 0.19                      | -0.06           |
| PD-IND     |        |                | 0.05 |                        | 0.44 $\pm$ 1.13 | 0.19                      | -0.06           |
| PD-BASE    |        |                |      |                        | 8.6             |                           | 8.4 $\pm$ 4.8   |
| PD-RESI    | BB     | 23             | 11   | 27 $\pm$ 20            | 13 $\pm$ 10     | 11                        | -4.7            |
| PD-BIOF    |        |                | 13   |                        | 15 $\pm$ 12     | 9.4                       | -6.3            |
| PD-IND     |        |                | 13   |                        | 15 $\pm$ 12     | 9.4                       | -6.2            |
| PD-BASE    |        |                |      |                        | 2.9             |                           | 6.3 $\pm$ 7.3   |
| PD-RESI    | CPAO   | 1.9            | 3.0  | 7.3 $\pm$ 18           | 6.3 $\pm$ 7.3   | -1.1                      | 0.00            |
| PD-BIOF    |        |                | 3.1  |                        | 6.4 $\pm$ 7.4   | -1.2                      | 0.00            |
| PD-IND     |        |                | 3.1  |                        | 6.4 $\pm$ 7.4   | -1.1                      | 0.00            |
| PD-BASE    |        |                |      |                        | 0.48            |                           | 0.53 $\pm$ 0.19 |
| PD-RESI    | ENPAC  | 3.8            | 0.60 | 4.6 $\pm$ 4.3          | 0.67 $\pm$ 0.27 | 3.2                       | -0.10           |
| PD-BIOF    |        |                | 0.60 |                        | 0.68 $\pm$ 0.28 | 3.1                       | -0.11           |
| PD-IND     |        |                | 0.56 |                        | 0.63 $\pm$ 0.26 | 3.2                       | -0.07           |
| PD-BASE    |        |                |      |                        | 0.56            |                           | 0.85 $\pm$ 1.1  |
| PD-RESI    | NATL   | 1.0            | 0.60 | 2.3 $\pm$ 3.5          | 1.1 $\pm$ 1.9   | 0.41                      | 0.03            |
| PD-BIOF    |        |                | 0.62 |                        | 1.2 $\pm$ 2     | 0.38                      | 0.03            |
| PD-IND     |        |                | 0.57 |                        | 1.1 $\pm$ 1.9   | 0.44                      | 0.04            |
| PD-BASE    |        |                |      |                        | 0.27            |                           | 0.4 $\pm$ 0.65  |
| PD-RESI    | SATL   | 0.46           | 0.29 | 0.95 $\pm$ 2.3         | 0.42 $\pm$ 0.69 | 0.18                      | -0.03           |
| PD-BIOF    |        |                | 0.33 |                        | 0.5 $\pm$ 0.79  | 0.13                      | -0.05           |
| PD-IND     |        |                | 0.32 |                        | 0.49 $\pm$ 0.78 | 0.14                      | -0.05           |
| PD-BASE    |        |                |      |                        | 1.19            |                           | 1.3 $\pm$ 1.1   |
| PD-RESI    | SEAS   | 5.8            | 1.81 | 9.8 $\pm$ 11           | 2.3 $\pm$ 2.8   | 4.0                       | -0.43           |
| PD-BIOF    |        |                | 1.87 |                        | 2.3 $\pm$ 2.9   | 3.9                       | -0.47           |
| PD-IND     |        |                | 1.80 |                        | 2.2 $\pm$ 2.8   | 4.0                       | -0.43           |
| PD-BASE    |        |                |      |                        | 0.00            |                           | 0.01 $\pm$ 0.03 |
| PD-RESI    | SO     | 0.59           | 0.00 | 1.1 $\pm$ 1.4          | 0.01 $\pm$ 0.03 | 0.58                      | 0.00            |
| PD-BIOF    |        |                | 0.0  |                        | 0.01 $\pm$ 0.03 | 0.58                      | 0.00            |
| PD-IND     |        |                | 0.0  |                        | 0.01 $\pm$ 0.02 | 0.58                      | 0.00            |

|         |       |      |      |               |                 |      |       |
|---------|-------|------|------|---------------|-----------------|------|-------|
| PD-BASE |       |      | 0.42 |               | $0.41 \pm 0.03$ | 0.42 | NA    |
| PD-RESI | WNPAC | 0.85 | 0.49 | $2.7 \pm 4.1$ | $0.47 \pm 0.03$ | 0.36 | -0.02 |
| PD-BIOF |       |      | 0.50 |               | $0.48 \pm 0.03$ | 0.35 | -0.03 |
| PD-IND  |       |      | 0.46 |               | $0.42 \pm 0.02$ | 0.39 | 0.00  |

189

190 **Table S15.** Summary statistics for model (Mod)-observation (Obs) comparisons of soluble Fe.  
 191 RMSE: root mean square error, SD: standard deviation.  $\Delta$ RMSE represents comparison  
 192 between the base simulation (PD-BASE) and each sensitivity case using the **central-residential**  
 193 emissions inventory as a lower constraint. Values are reported to two significant figures.

| Model Case | Region | Median Surface |      | Mean Surface           |                 | $\Delta$ Obs – Mod median | $\Delta$ RMSE   |
|------------|--------|----------------|------|------------------------|-----------------|---------------------------|-----------------|
|            |        | Concentration  |      | Concentration $\pm$ SD |                 |                           |                 |
|            |        | Obs            | Mod  | Obs                    | Mod             |                           |                 |
| PD-BASE    |        |                | 15.5 |                        | 16 $\pm$ 8.3    | -15                       | NA              |
| PD-RESI    | AS     | 0.40           | 15.6 | 2.69 $\pm$ 4.59        | 16 $\pm$ 8.3    | -15                       | 0.09            |
| PD-BIOF    |        |                | 18.3 |                        | 19 $\pm$ 8.8    | -18                       | 3.0             |
| PD-IND     |        |                | 18.1 |                        | 19 $\pm$ 8.7    | -18                       | 2.8             |
| PD-BASE    |        |                |      |                        | 0.05            |                           | 0.19 $\pm$ 0.39 |
| PD-RESI    | AUSP   | 0.24           | 0.05 | 1.13 $\pm$ 2.20        | 0.19 $\pm$ 0.4  | 0.2                       | 0.00            |
| PD-BIOF    |        |                | 0.05 |                        | 0.25 $\pm$ 0.61 | 0.2                       | -0.01           |
| PD-IND     |        |                | 0.05 |                        | 0.24 $\pm$ 0.59 | 0.2                       | 0.00            |
| PD-BASE    |        |                |      |                        | 8.2             |                           | 8.2 $\pm$ 4.8   |
| PD-RESI    | BB     | 22.76          | 8.3  | 27.03 $\pm$ 20.1       | 8.4 $\pm$ 4.9   | 14.4                      | -0.1            |
| PD-BIOF    |        |                | 10   |                        | 11 $\pm$ 7.9    | 12.7                      | -3.0            |
| PD-IND     |        |                | 9.9  |                        | 11 $\pm$ 7.8    | 12.8                      | -2.9            |
| PD-BASE    |        |                |      |                        | 2.9             |                           | 6.3 $\pm$ 7.4   |
| PD-RESI    | CPAO   | 1.91           | 2.9  | 7.28 $\pm$ 18.1        | 6.3 $\pm$ 7.4   | -1.0                      | 0.00            |
| PD-BIOF    |        |                | 3.0  |                        | 6.4 $\pm$ 7.4   | -1.1                      | 0.01            |
| PD-IND     |        |                | 3.0  |                        | 6.3 $\pm$ 7.4   | -1.1                      | 0.01            |
| PD-BASE    |        |                |      |                        | 0.48            |                           | 0.53 $\pm$ 0.2  |
| PD-RESI    | ENPAC  | 3.75           | 0.48 | 4.63 $\pm$ 4.25        | 0.5 $\pm$ 0.18  | 3.3                       | 0.00            |
| PD-BIOF    |        |                | 0.50 |                        | 0.6 $\pm$ 0.2   | 3.3                       | -0.03           |
| PD-IND     |        |                | 0.47 |                        | 0.5 $\pm$ 0.19  | 3.3                       | 0.01            |
| PD-BASE    |        |                |      |                        | 0.56            |                           | 0.86 $\pm$ 1.2  |
| PD-RESI    | NATL   | 1.01           | 0.56 | 2.34 $\pm$ 3.52        | 0.87 $\pm$ 1.2  | 0.4                       | 0.00            |
| PD-BIOF    |        |                | 0.58 |                        | 0.99 $\pm$ 1.5  | 0.4                       | -0.01           |
| PD-IND     |        |                | 0.51 |                        | 0.88 $\pm$ 1.4  | 0.5                       | 0.02            |
| PD-BASE    |        |                |      |                        | 0.26            |                           | 0.38 $\pm$ 0.63 |
| PD-RESI    | SATL   | 0.46           | 0.26 | 0.95 $\pm$ 2.25        | 0.38 $\pm$ 0.63 | 0.2                       | 0.00            |
| PD-BIOF    |        |                | 0.27 |                        | 0.4 $\pm$ 0.65  | 0.2                       | -0.02           |
| PD-IND     |        |                | 0.26 |                        | 0.39 $\pm$ 0.65 | 0.2                       | -0.01           |
| PD-BASE    |        |                |      |                        | 1.2             |                           | 1.3 $\pm$ 1.1   |
| PD-RESI    | SEAS   | 5.77           | 1.2  | 9.80 $\pm$ 11.2        | 1.3 $\pm$ 1.1   | 4.6                       | -0.01           |
| PD-BIOF    |        |                | 1.3  |                        | 1.5 $\pm$ 1.4   | 4.4                       | -0.12           |
| PD-IND     |        |                | 1.2  |                        | 1.4 $\pm$ 1.3   | 4.5                       | -0.07           |
| PD-BASE    |        |                |      |                        | 0.00            |                           | 0.01 $\pm$ 0.01 |
| PD-RESI    | SO     | 0.59           | 0.00 | 1.12 $\pm$ 1.4         | 0.01 $\pm$ 0.01 | 0.6                       | 0.00            |
| PD-BIOF    |        |                | 0.00 |                        | 0.01 $\pm$ 0.01 | 0.6                       | 0.00            |
| PD-IND     |        |                | 0.00 |                        | 0.01 $\pm$ 0.01 | 0.6                       | 0.00            |

|         |       |      |      |                 |                 |     |       |
|---------|-------|------|------|-----------------|-----------------|-----|-------|
| PD-BASE |       |      | 0.42 |                 | $0.41 \pm 0.12$ | 0.4 | NA    |
| PD-RESI | WNPAC | 0.85 | 0.43 | $2.67 \pm 4.06$ | $0.41 \pm 0.12$ | 0.4 | 0.00  |
| PD-BIOF |       |      | 0.45 |                 | $0.43 \pm 0.12$ | 0.4 | -0.01 |
| PD-IND  |       |      | 0.40 |                 | $0.38 \pm 0.12$ | 0.4 | 0.02  |

194

195 **Table S16.** Summary statistics for model (Mod)-observation (Obs) comparisons of Fe  
 196 solubility. RMSE: root mean square error, SD: standard deviation.  $\Delta$ RMSE represents  
 197 comparison between the base simulation (PD-BASE) and each sensitivity case using the **high-**  
 198 residential emissions inventory as an upper constraint. Values are reported to two significant  
 199 figures.

| Model Case | Region | Median Surface Solubility |      | Mean Surface Fractional Solubility $\pm$ SD |                 | $\Delta$ Obs – Mod median | $\Delta$ RMSE |
|------------|--------|---------------------------|------|---------------------------------------------|-----------------|---------------------------|---------------|
|            |        | Obs                       | Mod  | Obs                                         | Mod             |                           |               |
| PD-BASE    | AS     | 0.001                     | 0.02 | 0.004                                       | $0.02 \pm 0.01$ | -0.02                     | 0.00          |
| PD-RESI    |        |                           | 0.02 |                                             | $0.03 \pm 0.01$ | -0.02                     | 0.01          |
| PD-BIOF    |        |                           | 0.03 |                                             | $0.03 \pm 0.01$ | -0.03                     | 0.02          |
| PD-IND     |        |                           | 0.03 |                                             | $0.03 \pm 0.01$ | -0.03                     | 0.02          |
| PD-BASE    | AUSP   | 0.03                      | 0.04 | 0.08                                        | $0.04 \pm 0.01$ | -0.01                     | 0.00          |
| PD-RESI    |        |                           | 0.05 |                                             | $0.05 \pm 0.01$ | -0.01                     | 0.00          |
| PD-BIOF    |        |                           | 0.05 |                                             | $0.06 \pm 0.01$ | -0.02                     | 0.00          |
| PD-IND     |        |                           | 0.05 |                                             | $0.05 \pm 0.01$ | -0.02                     | 0.00          |
| PD-BASE    | BB     | 0.06                      | 0.05 | 0.07                                        | $0.04 \pm 0.01$ | 0.01                      | 0.00          |
| PD-RESI    |        |                           | 0.06 |                                             | $0.06 \pm 0.01$ | -0.01                     | 0.00          |
| PD-BIOF    |        |                           | 0.07 |                                             | $0.07 \pm 0.01$ | -0.01                     | 0.00          |
| PD-IND     |        |                           | 0.07 |                                             | $0.07 \pm 0.01$ | -0.01                     | 0.00          |
| PD-BASE    | CPAO   | 0.03                      | 0.04 | 0.06                                        | $0.04 \pm 0.03$ | -0.01                     | 0.00          |
| PD-RESI    |        |                           | 0.04 |                                             | $0.04 \pm 0.03$ | -0.01                     | 0.00          |
| PD-BIOF    |        |                           | 0.04 |                                             | $0.05 \pm 0.03$ | -0.01                     | 0.00          |
| PD-IND     |        |                           | 0.04 |                                             | $0.05 \pm 0.03$ | -0.01                     | 0.00          |
| PD-BASE    | ENPAC  | 0.07                      | 0.06 | 0.08                                        | $0.07 \pm 0.02$ | 0.01                      | 0.00          |
| PD-RESI    |        |                           | 0.07 |                                             | $0.09 \pm 0.02$ | 0.00                      | 0.00          |
| PD-BIOF    |        |                           | 0.07 |                                             | $0.09 \pm 0.02$ | 0.00                      | 0.00          |
| PD-IND     |        |                           | 0.07 |                                             | $0.08 \pm 0.02$ | 0.00                      | 0.00          |
| PD-BASE    | NATL   | 0.05                      | 0.07 | 0.12                                        | $0.07 \pm 0.02$ | -0.02                     | 0.00          |
| PD-RESI    |        |                           | 0.08 |                                             | $0.08 \pm 0.02$ | -0.03                     | 0.00          |
| PD-BIOF    |        |                           | 0.09 |                                             | $0.09 \pm 0.02$ | -0.04                     | 0.00          |
| PD-IND     |        |                           | 0.08 |                                             | $0.08 \pm 0.02$ | -0.03                     | 0.00          |
| PD-BASE    | SATL   | 0.02                      | 0.03 | 0.04                                        | $0.03 \pm 0.01$ | -0.01                     | 0.00          |
| PD-RESI    |        |                           | 0.04 |                                             | $0.04 \pm 0.01$ | -0.01                     | 0.00          |
| PD-BIOF    |        |                           | 0.04 |                                             | $0.04 \pm 0.01$ | -0.02                     | 0.00          |
| PD-IND     |        |                           | 0.04 |                                             | $0.04 \pm 0.01$ | -0.02                     | 0.00          |
| PD-BASE    | SEAS   | 0.07                      | 0.04 | 0.07                                        | $0.06 \pm 0.04$ | 0.02                      | 0.00          |
| PD-RESI    |        |                           | 0.07 |                                             | $0.09 \pm 0.04$ | 0.00                      | 0.00          |
| PD-BIOF    |        |                           | 0.07 |                                             | $0.09 \pm 0.04$ | 0.00                      | 0.00          |
| PD-IND     |        |                           | 0.07 |                                             | $0.08 \pm 0.03$ | 0.00                      | -0.01         |
| PD-BASE    | SO     | 0.05                      | 0.03 | 0.13                                        | $0.03 \pm 0.01$ | 0.01                      | 0.00          |
| PD-RESI    |        |                           | 0.03 |                                             | $0.04 \pm 0.01$ | 0.01                      | 0.00          |
| PD-BIOF    |        |                           | 0.04 |                                             | $0.04 \pm 0.01$ | 0.01                      | 0.00          |

|         |       |      |      |      |                 |      |      |
|---------|-------|------|------|------|-----------------|------|------|
| PD-IND  |       |      | 0.04 |      | $0.04 \pm 0.01$ | 0.01 | 0.00 |
| PD-BASE |       |      | 0.07 |      | $0.08 \pm 0.03$ | 0.02 | 0.00 |
| PD-RESI | WNPAC | 0.09 | 0.08 | 0.09 | $0.09 \pm 0.03$ | 0.01 | 0.00 |
| PD-BIOF |       |      | 0.08 |      | $0.09 \pm 0.03$ | 0.00 | 0.00 |
| PD-IND  |       |      | 0.07 |      | $0.08 \pm 0.02$ | 0.01 | 0.00 |

200

201 **Table S17.** Summary statistics for model (Mod)-observation (Obs) comparisons of Fe  
 202 solubility. RMSE: root mean square error, SD: standard deviation.  $\Delta$ RMSE represents  
 203 comparison between the base simulation (PD-BASE) and each sensitivity case using the  
 204 **central**-residential emissions inventory as an upper constraint. Values are reported to two  
 205 significant figures.

| Model Case | Region | Median Surface Solubility |      | Mean Surface Fractional Solubility $\pm$ SD |                 | $\Delta$ Obs – Mod median | $\Delta$ RMSE |
|------------|--------|---------------------------|------|---------------------------------------------|-----------------|---------------------------|---------------|
|            |        | Obs                       | Mod  | Obs                                         | Mod             |                           |               |
| PD-BASE    | AS     | 0.001                     | 0.02 | 0.004                                       | $0.02 \pm 0.01$ | -0.02                     | 0.00          |
| PD-RESI    |        |                           | 0.02 |                                             | $0.02 \pm 0.01$ | -0.02                     | 0.00          |
| PD-BIOF    |        |                           | 0.02 |                                             | $0.02 \pm 0.01$ | -0.02                     | 0.01          |
| PD-IND     |        |                           | 0.02 |                                             | $0.02 \pm 0.01$ | -0.02                     | 0.00          |
| PD-BASE    | AUSP   | 0.03                      | 0.04 | 0.08                                        | $0.04 \pm 0.01$ | -0.01                     | 0.00          |
| PD-RESI    |        |                           | 0.04 |                                             | $0.04 \pm 0.01$ | -0.01                     | 0.00          |
| PD-BIOF    |        |                           | 0.05 |                                             | $0.05 \pm 0.01$ | -0.01                     | 0.00          |
| PD-IND     |        |                           | 0.04 |                                             | $0.04 \pm 0.01$ | -0.01                     | -0.05         |
| PD-BASE    | BB     | 0.06                      | 0.05 | 0.07                                        | $0.04 \pm 0.01$ | 0.01                      | 0.00          |
| PD-RESI    |        |                           | 0.05 |                                             | $0.04 \pm 0.01$ | 0.01                      | 0.00          |
| PD-BIOF    |        |                           | 0.06 |                                             | $0.05 \pm 0.01$ | 0.00                      | 0.00          |
| PD-IND     |        |                           | 0.05 |                                             | $0.05 \pm 0.01$ | 0.00                      | 0.00          |
| PD-BASE    | CPAO   | 0.03                      | 0.04 | 0.06                                        | $0.04 \pm 0.03$ | -0.01                     | 0.00          |
| PD-RESI    |        |                           | 0.04 |                                             | $0.04 \pm 0.03$ | -0.01                     | 0.00          |
| PD-BIOF    |        |                           | 0.04 |                                             | $0.04 \pm 0.03$ | -0.01                     | 0.00          |
| PD-IND     |        |                           | 0.04 |                                             | $0.04 \pm 0.03$ | -0.01                     | 0.00          |
| PD-BASE    | ENPAC  | 0.07                      | 0.06 | 0.08                                        | $0.07 \pm 0.02$ | 0.01                      | 0.00          |
| PD-RESI    |        |                           | 0.06 |                                             | $0.07 \pm 0.02$ | 0.01                      | 0.00          |
| PD-BIOF    |        |                           | 0.06 |                                             | $0.07 \pm 0.02$ | 0.01                      | 0.00          |
| PD-IND     |        |                           | 0.06 |                                             | $0.07 \pm 0.02$ | 0.02                      | 0.17          |
| PD-BASE    | NATL   | 0.05                      | 0.07 | 0.12                                        | $0.07 \pm 0.02$ | -0.02                     | 0.00          |
| PD-RESI    |        |                           | 0.07 |                                             | $0.07 \pm 0.02$ | -0.02                     | 0.00          |
| PD-BIOF    |        |                           | 0.07 |                                             | $0.07 \pm 0.02$ | -0.02                     | 0.00          |
| PD-IND     |        |                           | 0.06 |                                             | $0.06 \pm 0.01$ | -0.01                     | 0.00          |
| PD-BASE    | SATL   | 0.02                      | 0.03 | 0.04                                        | $0.03 \pm 0.01$ | -0.01                     | 0.00          |
| PD-RESI    |        |                           | 0.03 |                                             | $0.03 \pm 0.01$ | -0.01                     | 0.00          |
| PD-BIOF    |        |                           | 0.04 |                                             | $0.03 \pm 0.01$ | -0.01                     | -0.21         |
| PD-IND     |        |                           | 0.03 |                                             | $0.03 \pm 0.01$ | -0.01                     | 0.00          |
| PD-BASE    | SEAS   | 0.07                      | 0.04 | 0.07                                        | $0.06 \pm 0.04$ | 0.02                      | 0.00          |
| PD-RESI    |        |                           | 0.04 |                                             | $0.06 \pm 0.04$ | 0.02                      | 0.00          |
| PD-BIOF    |        |                           | 0.05 |                                             | $0.07 \pm 0.05$ | 0.02                      | 0.02          |
| PD-IND     |        |                           | 0.05 |                                             | $0.06 \pm 0.04$ | 0.02                      | 0.19          |
| PD-BASE    | SO     | 0.05                      | 0.03 | 0.13                                        | $0.03 \pm 0.01$ | 0.01                      | 0.00          |
| PD-RESI    |        |                           | 0.03 |                                             | $0.03 \pm 0.01$ | 0.01                      | 0.00          |
| PD-BIOF    |        |                           | 0.03 |                                             | $0.03 \pm 0.01$ | 0.01                      | 0.16          |

|         |       |      |      |      |                 |      |      |
|---------|-------|------|------|------|-----------------|------|------|
| PD-IND  |       |      | 0.03 |      | $0.03 \pm 0.01$ | 0.01 | 0.16 |
| PD-BASE |       |      | 0.07 |      | $0.08 \pm 0.03$ | 0.02 | 0.00 |
| PD-RESI | WNPAC | 0.09 | 0.07 | 0.09 | $0.08 \pm 0.03$ | 0.02 | 0.00 |
| PD-BIOF |       |      | 0.07 |      | $0.08 \pm 0.03$ | 0.01 | 0.00 |
| PD-IND  |       |      | 0.06 |      | $0.07 \pm 0.02$ | 0.02 | 0.00 |

206

207

208

209

210 **References:**

- 211 Agrawal, H., Malloy, Q. G. J., Welch, W. A., Wayne Miller, J., and Cocker, D. R.: In-use gaseous and particulate  
212 matter emissions from a modern ocean going container vessel, *Atmospheric Environment*, 42, 5504-5510,  
213 <https://doi.org/10.1016/j.atmosenv.2008.02.053>, 2008.
- 214 Al-Negheimish, A. I., Al-Mutlaq, F. M., Fares, G., Alhozaimy, A. M., and Iqbal Khan, M.: Characterization of  
215 chemical accelerators for sustainable recycling of fresh electric-arc furnace dust in cement pastes,  
216 *Advanced Powder Technology*, 32, 3046-3062, <https://doi.org/10.1016/j.appt.2021.06.019>, 2021.
- 217 Alizadeh, M., and Momeni, M.: The effect of the scrap/DRI ratio on the specification of the EAF dust and its  
218 influence on mechanical properties of the concrete treated by its dust, *Construction and Building Materials*,  
219 112, 1041-1045, <https://doi.org/10.1016/j.conbuildmat.2016.03.011>, 2016.
- 220 Alsheyab, M. A. T., and Khedaywi, T. S.: Analysis of the Effect of Temperature on the Resilient Modulus of  
221 Asphalt Concrete Mixed with Electric Arc Furnace Dust (EAFD), *Water, Air, & Soil Pollution*, 227, 80,  
222 [10.1007/s11270-016-2776-4](https://doi.org/10.1007/s11270-016-2776-4), 2016.
- 223 Alves, C., Gonçalves, C., Fernandes, A. P., Tarelho, L., and Pio, C.: Fireplace and woodstove fine particle  
224 emissions from combustion of western Mediterranean wood types, *Atmospheric Research*, 101, 692-700,  
225 <https://doi.org/10.1016/j.atmosres.2011.04.015>, 2011.
- 226 Baldo, C., Ito, A., Krom, M. D., Li, W., Jones, T., Drake, N., Ignatyev, K., Davidson, N., and Shi, Z.: Iron from  
227 coal combustion particles dissolves much faster than mineral dust under simulated atmospheric acid  
228 conditions, *Atmos. Chem. Phys. Discuss.*, 2021, 1-31, 2021.
- 229 Bayuseno, A. P., and Schmahl, W. W.: Characterization of MSWI fly ash through mineralogy and water extraction,  
230 *Resources, Conservation and Recycling*, 55, 524-534, 2011.
- 231 Bond, T. C., Streets, D. G., Yarber, K. F., Nelson, S. M., Woo, J.-H., and Klimont, Z.: A technology-based global  
232 inventory of black and organic carbon emissions from combustion, *Journal of Geophysical Research:  
233 Atmospheres*, 109, <https://doi.org/10.1029/2003JD003697>, 2004.
- 234 Celso, V., Dabek-Zlotorzynska, E., and McCurdy, M.: Chemical Characterization of Exhaust Emissions from  
235 Selected Canadian Marine Vessels: The Case of Trace Metals and Lanthanoids, *Environmental Science &  
236 Technology*, 49, 5220-5226, [10.1021/acs.est.5b00127](https://doi.org/10.1021/acs.est.5b00127), 2015.
- 237 Cobo, M., Gálvez, A., Conesa, J. A., and Montes de Correa, C.: Characterization of fly ash from a hazardous  
238 waste incinerator in Medellin, Colombia, *Journal of hazardous materials*, 168, 1223-1232, 2009.
- 239 Desboeufs, K., Sofikitis, A., Losno, R., Colin, J., and Ausset, P.: Dissolution and solubility of trace metals from  
240 natural and anthropogenic aerosol particulate matter, *Chemosphere*, 58, 195-203, 2005.
- 241 Dutta, B. K., Khanra, S., and Mallick, D.: Leaching of elements from coal fly ash: Assessment of its potential for  
242 use in filling abandoned coal mines, *Fuel*, 88, 1314-1323, 2009.
- 243 Fu, H., Lin, J., Shang, G., Dong, W., Grassian, V. H., Carmichael, G. R., Li, Y., and Chen, J.: Solubility of Iron  
244 from Combustion Source Particles in Acidic Media Linked to Iron Speciation, *Environmental Science &  
245 Technology*, 46, 11119-11127, 2012.
- 246 Funari, V., Mäkinen, J., Salminen, J., Braga, R., Dinelli, E., and Revitzer, H.: Metal removal from Municipal Solid  
247 Waste Incineration fly ash: A comparison between chemical leaching and bioleaching, *Waste Management*,  
248 60, 397-406, 2017.
- 249 Goodarzi, F.: Characteristics and composition of fly ash from Canadian coal-fired power plants, *Fuel*, 85, 1418-  
250 1427, <https://doi.org/10.1016/j.fuel.2005.11.022>, 2006.

251 Hagni, A. M., Hagni, R. D., and Demars, C.: Mineralogical characteristics of electric arc furnace dusts, *JOM*, 43,  
252 28-30, 10.1007/BF03220543, 1991.

253 Hedberg, E., Kristensson, A., Ohlsson, M., Johansson, C., Johansson, P.-Å., Swietlicki, E., Vesely, V., Wideqvist,  
254 U., and Westerholm, R.: Chemical and physical characterization of emissions from birch wood combustion  
255 in a wood stove, *Atmospheric Environment*, 36, 4823-4837, [https://doi.org/10.1016/S1352-](https://doi.org/10.1016/S1352-2310(02)00417-X)  
256 2310(02)00417-X, 2002.

257 Hildemann, L. M., Markowski, G. R., Jones, M. C., and Cass, G. R.: Submicrometer Aerosol Mass Distributions  
258 of Emissions from Boilers, Fireplaces, Automobiles, Diesel Trucks, and Meat-Cooking Operations,  
259 *Aerosol Science and Technology*, 14, 138-152, 10.1080/02786829108959478, 1991.

260 Hleis, D., Fernández-Olmo, I., Ledoux, F., Kfoury, A., Courcot, L., Desmonts, T., and Courcot, D.: Chemical  
261 profile identification of fugitive and confined particle emissions from an integrated iron and steelmaking  
262 plant, *Journal of hazardous materials*, 250-251, 246-255, <https://doi.org/10.1016/j.jhazmat.2013.01.080>,  
263 2013.

264 Hoesly, R. M., Smith, S. J., Feng, L., Klimont, Z., Janssens-Maenhout, G., Pitkanen, T., Seibert, J. J., Vu, L.,  
265 Andres, R. J., Bolt, R. M., Bond, T. C., Dawidowski, L., Kholod, N., Kurokawa, J. I., Li, M., Liu, L., Lu,  
266 Z., Moura, M. C. P., O'Rourke, P. R., and Zhang, Q.: Historical (1750–2014) anthropogenic emissions of  
267 reactive gases and aerosols from the Community Emissions Data System (CEDS), *Geoscientific Model*  
268 *Development*, 11, 369-408, 10.5194/gmd-11-369-2018, 2018.

269 Jankowski, J., Ward, C. R., French, D., and Groves, S.: Mobility of trace elements from selected Australian fly  
270 ashes and its potential impact on aquatic ecosystems, *Fuel*, 85, 243-256, 2006.

271 Laforest, G., and Duchesne, J.: Stabilization of electric arc furnace dust by the use of cementitious materials: Ionic  
272 competition and long-term leachability, *Cement and Concrete Research*, 36, 1628-1634,  
273 <https://doi.org/10.1016/j.cemconres.2006.05.012>, 2006.

274 Li, C., Liu, W., Jiao, F., Yang, C., Li, G., Liu, S., and Qin, W.: Separation and recovery of zinc, lead and iron from  
275 electric arc furnace dust by low temperature smelting, *Separation and Purification Technology*, 312,  
276 123355, <https://doi.org/10.1016/j.seppur.2023.123355>, 2023.

277 Li, R., Zhang, H., Wang, F., He, Y., Huang, C., Luo, L., Dong, S., Jia, X., and Tang, M.: Mass fractions, solubility,  
278 speciation and isotopic compositions of iron in coal and municipal waste fly ash, *Science of The Total*  
279 *Environment*, 838, 155974, <https://doi.org/10.1016/j.scitotenv.2022.155974>, 2022.

280 Li, S., Zhang, B., Wu, D., Li, Z., Chu, S.-Q., Ding, X., Tang, X., Chen, J., and Li, Q.: Magnetic Particles  
281 Unintentionally Emitted from Anthropogenic Sources: Iron and Steel Plants, *Environmental Science &*  
282 *Technology Letters*, 8, 295-300, 10.1021/acs.estlett.1c00164, 2021.

283 Lin, K. L., Wang, K. S., Tzeng, B. Y., and Lin, C. Y.: The reuse of municipal solid waste incinerator fly ash slag  
284 as a cement substitute, *Resources, Conservation and Recycling*, 39, 315-324, 2003.

285 Liu, Y., Zheng, L., Li, X., and Xie, S.: SEM/EDS and XRD characterization of raw and washed MSWI fly ash  
286 sintered at different temperatures, *Journal of hazardous materials*, 162, 161-173, 2009.

287 Loaiza, A., Cifuentes, S., and Colorado, H. A.: Asphalt modified with superfine electric arc furnace steel dust  
288 (EAF dust) with high zinc oxide content, *Construction and Building Materials*, 145, 538-547,  
289 <https://doi.org/10.1016/j.conbuildmat.2017.04.050>, 2017.

290 Machado, J. G. M. S., Brehm, F. A., Moraes, C. A. M., Santos, C. A. d., Vilela, A. C. F., and Cunha, J. B. M. d.:  
291 Chemical, physical, structural and morphological characterization of the electric arc furnace dust, *Journal*  
292 *of hazardous materials*, 136, 953-960, <https://doi.org/10.1016/j.jhazmat.2006.01.044>, 2006.

293 Meij, R.: Trace element behavior in coal-fired power plants, *Fuel Processing Technology*, 39, 199-217,  
 294 [https://doi.org/10.1016/0378-3820\(94\)90180-5](https://doi.org/10.1016/0378-3820(94)90180-5), 1994.

295 Moreno, N., Querol, X., Andrés, J. M., Stanton, K., Towler, M., Nugteren, H., Janssen-Jurkovicová, M., and Jones,  
 296 R.: Physico-chemical characteristics of European pulverized coal combustion fly ashes, *Fuel*, 84, 1351-  
 297 1363, 2005.

298 Oakes, M., Ingall, E. D., Lai, B., Shafer, M. M., Hays, M. D., Liu, Z. G., Russell, A. G., and Weber, R. J.: Iron  
 299 Solubility Related to Particle Sulfur Content in Source Emission and Ambient Fine Particles,  
 300 *Environmental Science & Technology*, 46, 6637-6644, 2012.

301 Patil, R. S., Kumar, R., Menon, R., Shah, M. K., and Sethi, V.: Development of particulate matter speciation  
 302 profiles for major sources in six cities in India, *Atmospheric Research*, 132-133, 1-11,  
 303 <https://doi.org/10.1016/j.atmosres.2013.04.012>, 2013.

304 Raclavská, H., Corsaro, A., Hartmann-Koval, S., and Juchelková, D.: Enrichment and distribution of 24 elements  
 305 within the sub-sieve particle size distribution ranges of fly ash from wastes incinerator plants, *Journal of*  
 306 *Environmental Management*, 203, 1169-1177, 2017.

307 Rathod, S. D., Hamilton, D. S., Mahowald, N. M., Klimont, Z., Corbett, J. J., and Bond, T. C.: A Mineralogy-  
 308 Based Anthropogenic Combustion-Iron Emission Inventory, *Journal of Geophysical Research:*  
 309 *Atmospheres*, 125, e2019JD032114, <https://doi.org/10.1029/2019JD032114>, 2020.

310 Schmidl, C., Marr, I. L., Caseiro, A., Kotianová, P., Berner, A., Bauer, H., Kasper-Giebl, A., and Puxbaum, H.:  
 311 Chemical characterisation of fine particle emissions from wood stove combustion of common woods  
 312 growing in mid-European Alpine regions, *Atmospheric Environment*, 42, 126-141,  
 313 <https://doi.org/10.1016/j.atmosenv.2007.09.028>, 2008.

314 Schroth, A. W., Crusius, J., Sholkovitz, E. R., and Bostick, B. C.: Iron solubility driven by speciation in dust  
 315 sources to the ocean, *Nature Geoscience*, 2, 337-340, 2009.

316 Silva, V. S., Silva, J. S., Costa, B. d. S., Labes, C., and Oliveira, R. M. P. B.: Preparation of glaze using electric-  
 317 arc furnace dust as raw material, *Journal of Materials Research and Technology*, 8, 5504-5514,  
 318 <https://doi.org/10.1016/j.jmrt.2019.09.018>, 2019.

319 Sippula, O., Hokkinen, J., Puustinen, H., Yli-Pirilä, P., and Jokiniemi, J.: Comparison of particle emissions from  
 320 small heavy fuel oil and wood-fired boilers, *Atmospheric Environment*, 43, 4855-4864,  
 321 <https://doi.org/10.1016/j.atmosenv.2009.07.022>, 2009.

322 Sippula, O., Stengel, B., Sklorz, M., Streibel, T., Rabe, R., Orasche, J., Lintelmann, J., Michalke, B., Abbaszade,  
 323 G., Radischat, C., Gröger, T., Schnelle-Kreis, J., Harndorf, H., and Zimmermann, R.: Particle Emissions  
 324 from a Marine Engine: Chemical Composition and Aromatic Emission Profiles under Various Operating  
 325 Conditions, *Environmental Science & Technology*, 48, 11721-11729, [10.1021/es502484z](https://doi.org/10.1021/es502484z), 2014.

326 Souza, C. A. C. D., Machado, A. T., Lima, L. R. P. d. A., and Cardoso, R. J. C.: Stabilization of electric-arc furnace  
 327 dust in concrete, *Materials Research*, 13, 513-519, 2010.

328 Stathopoulos, V. N., Papandreou, A., Kanellopoulou, D., and Stournaras, C. J.: Structural ceramics containing  
 329 electric arc furnace dust, *Journal of hazardous materials*, 262, 91-99,  
 330 <https://doi.org/10.1016/j.jhazmat.2013.08.028>, 2013.

331 Vieira, C. M. F., Sanchez, R., Monteiro, S. N., Lalla, N., and Quaranta, N.: Recycling of electric arc furnace dust  
 332 into red ceramic, *Journal of Materials Research and Technology*, 2, 88-92,  
 333 <https://doi.org/10.1016/j.jmrt.2012.09.001>, 2013.

334 Wan, X., Wang, W., Ye, T., Guo, Y., and Gao, X.: A study on the chemical and mineralogical characterization of

335 MSWI fly ash using a sequential extraction procedure, *Journal of hazardous materials*, 134, 197-201, 2006.

336 Watson, J. G., Chow, J. C., and Houck, J. E.: PM<sub>2.5</sub> chemical source profiles for vehicle exhaust, vegetative  
337 burning, geological material, and coal burning in Northwestern Colorado during 1995, *Chemosphere*, 43,  
338 1141-1151, [https://doi.org/10.1016/S0045-6535\(00\)00171-5](https://doi.org/10.1016/S0045-6535(00)00171-5), 2001.

339 Wu, H.-Y., and Ting, Y.-P.: Metal extraction from municipal solid waste (MSW) incinerator fly ash—Chemical  
340 leaching and fungal bioleaching, *Enzyme and Microbial Technology*, 38, 839-847, 2006.

341 Wu, K., Shi, H., Schutter, G. D., Guo, X., and Ye, G.: Preparation of alinite cement from municipal solid waste  
342 incineration fly ash, *Cement and Concrete Composites*, 34, 322-327, 2012.

343 Xia, D. K., and Picklesi, C. A.: Microwave caustic leaching of electric arc furnace dust, *Minerals Engineering*, 13,  
344 79-94, [https://doi.org/10.1016/S0892-6875\(99\)00151-X](https://doi.org/10.1016/S0892-6875(99)00151-X), 2000.

345 Ye, L., Peng, Z., Ye, Q., Wang, L., Augustine, R., Perez, M., Liu, Y., Liu, M., Tang, H., Rao, M., Li, G., and Jiang,  
346 T.: Toward environmentally friendly direct reduced iron production: A novel route of comprehensive  
347 utilization of blast furnace dust and electric arc furnace dust, *Waste Management*, 135, 389-396,  
348 <https://doi.org/10.1016/j.wasman.2021.08.045>, 2021.

349 Zhang, H., Li, R., Dong, S., Wang, F., Zhu, Y., Meng, H., Huang, C., Ren, Y., Wang, X., Hu, X., Li, T., Peng, C.,  
350 Zhang, G., Xue, L., Wang, X., and Tang, M.: Abundance and Fractional Solubility of Aerosol Iron During  
351 Winter at a Coastal City in Northern China: Similarities and Contrasts Between Fine and Coarse Particles,  
352 *Journal of Geophysical Research: Atmospheres*, 127, e2021JD036070,  
353 <https://doi.org/10.1029/2021JD036070>, 2022.

354 Zhang, H., Zhao, Y., and Qi, J.: Utilization of municipal solid waste incineration (MSWI) fly ash in ceramic brick:  
355 Product characterization and environmental toxicity, *Waste Management*, 31, 331-341, 2011.

356 Zhang, H., Wang, S., Hao, J., Wan, L., Jiang, J., Zhang, M., Mestl, H. E. S., Alnes, L. W. H., Aunan, K., and  
357 Mellouki, A. W.: Chemical and size characterization of particles emitted from the burning of coal and wood  
358 in rural households in Guizhou, China, *Atmospheric Environment*, 51, 94-99,  
359 <https://doi.org/10.1016/j.atmosenv.2012.01.042>, 2012.
